# Supplementary material
Source: PubMed Central journal article supplement (PMC7819676)
Supplement: hhf-14-e007022-s001.pdf [file hhf-14-e007022-s001.pdf]

## Supplemental Material

### **Proteomic and functional studies reveal detyrosinated tubulin as treatment target in sarcomere mutation-induced hypertrophic cardiomyopathy**

Authors:

Maike Schuldt<sup>1</sup>, MSc, Jiayi Pei<sup>2</sup>, MSc, Magdalena Harakalova<sup>2</sup>, PhD, Larissa M. Dorsch<sup>1</sup>, MSc, Saskia Schlossarek<sup>3,4</sup>, PhD, Michal Mokry<sup>5</sup>, PhD, Jaco C. Knol<sup>6</sup>, PhD, Thang V. Pham<sup>6</sup>, PhD, Tim Schelfhorst<sup>6</sup>, BSc, Sander R. Piersma<sup>6</sup>, PhD, Cris dos Remedios<sup>7</sup>, PhD, Michiel Dalinghaus<sup>8</sup>, MD, PhD, Michelle Michels<sup>9</sup>, MD, PhD, Folkert W. Asselbergs<sup>2,10,11</sup>, MD, PhD, Marie-Jo Moutin<sup>12</sup>, PhD, Lucie Carrier<sup>3,4</sup>, PhD, Connie R. Jimenez<sup>6</sup>, PhD, Jolanda van der Velden<sup>1†\*</sup>, PhD, Diederik W.D. Kuster<sup>1†\*</sup>, PhD

†shared last author

\*corresponding author

Affiliations:

<sup>1</sup>Amsterdam UMC, Vrije Universiteit Amsterdam, Department of Physiology, Amsterdam Cardiovascular Sciences, Amsterdam, The Netherlands

<sup>2</sup>Department of Cardiology, Division Heart and Lungs, University Medical Center Utrecht, Utrecht, The Netherlands

<sup>3</sup>Institute of Experimental Pharmacology and Toxicology, Cardiovascular Research Center, University Medical Center Hamburg-Eppendorf, Hamburg, Germany

<sup>4</sup>DZHK (German Centre for Cardiovascular Research), partner site Hamburg/Kiel/Lübeck, Hamburg, Germany

<sup>5</sup>Department of Pediatric Gastroenterology, Wilhelmina Children's Hospital, University Medical Center Utrecht, Utrecht, The Netherlands

<sup>6</sup>Amsterdam UMC, Vrije Universiteit Amsterdam, Department of Medical Oncology, OncoProteomics Laboratory, VUmc-Cancer Center Amsterdam, Amsterdam, The Netherlands

<sup>7</sup>Sydney Heart Bank, Discipline of Anatomy, Bosch Institute, University of Sydney, Sydney, Australia

<sup>8</sup>Department of Pediatric Cardiology, Erasmus Medical Center Rotterdam, Rotterdam, The Netherlands

<sup>9</sup>Department of Cardiology, Thorax Center, Erasmus Medical Center Rotterdam, Rotterdam, The Netherlands

<sup>10</sup>Institute of Cardiovascular Science, Faculty of Population Health Sciences, University College London, London, United Kingdom

<sup>11</sup>Health Data Research UK and Institute of Health Informatics, University College London, London, United Kingdom

<sup>12</sup>Grenoble Institut des Neurosciences (GIN), Université Grenoble Alpes, Grenoble, France

## **Supplemental Methods**

### ***Proteomics analysis***

#### *In-gel digestion*

In-gel digestion was performed as described previously<sup>16</sup>. The proteins were in-gel reduced with 10 mM DTT and alkylated with 54 mM iodoacetamide. Each gel lane was cut into 5 pieces (*Figure S1*) which were subsequently sliced into 1 mm<sup>3</sup> cubes. Proteins were digested in-gel with 6.3 ng/ml trypsin. Peptides were extracted from gel slices with 1% formic acid and 5% formic acid/50% acetonitrile and concentrated in a vacuum centrifuge prior to nano-LC-MS/MS measurement. Samples were measured by LC-MS per gel band starting at the high molecular weight (MW) fraction for all samples, before continuing with the next gel band until the last (low MW fraction) band was measured. Injections alternated between all different group samples to minimize experimental bias between groups.

#### *Nano-LC-MS/MS*

Analysis of the experiment was performed as described in Piersma et al<sup>17</sup>. Peptides were separated using an Ultimate 3000 Nano LC-MS/MS system (Dionex LC-Packings, Amsterdam, The Netherlands) equipped with a 40 cm x 75 µm ID fused silica column custom packed with 1.9 µm, 120 Å ReproSil Pur C18 aqua (Dr Maisch GMBH, Ammerbuch-Entringen, Germany). After injection, peptides were trapped at 6 µl/min on a 10 mm x 100 µm ID trap column packed with 5 µm, 120 Å ReproSil Pur C18 aqua at 2% buffer B (buffer A: 0.5% acetic acid (Fischer Scientific), buffer B: 80% acetonitrile, 0.5% acetic acid) and separated at 300 nl/min in a 10–40% buffer B gradient in 60 minutes (90 min inject-to-inject). Eluting peptides were ionized at a potential of + 2 kV into a Q Exactive mass spectrometer (Thermo Fisher, Bremen, Germany). Intact masses were measured at resolution 70,000 (at m/z 200) in the orbitrap using an automatic gain control (AGC) target value of 3x10<sup>6</sup> charges. The top 10 peptide signals (charge-states 2+ and higher) were submitted to MS/MS in the HCD (higher-energy collision) cell using 1.6 amu isolation width and 25% normalized collision energy. MS/MS spectra were acquired at resolution 17,500 (at m/z 200) in the orbitrap using an AGC target value of 1x10<sup>6</sup> charges, a maxIT of 60 ms and an underfill ratio of 0.1%. Dynamic exclusion was applied with a repeat count of 1 and an exclusion time of 30 s.

#### *Data analysis*

MS/MS spectra were searched against a Uniprot human reference proteome FASTA file (Swissprot\_2017\_03\_human\_canonical\_and\_isoform.fasta, 42161 entries) using MaxQuant version 1.5.4.1. Enzyme specificity was set to trypsin and up to two missed cleavages were allowed. Cysteine

carboxamidomethylation was treated as fixed modification, and methionine oxidation and N-terminal acetylation as variable modifications. Peptide precursor ions were searched with a maximum mass deviation of 4.5 parts per million (ppm) and fragment ions with a maximum mass deviation of 20 ppm. Peptide and protein identifications were filtered at a false discovery rate (FDR) of 1% using the decoy database strategy. The minimal peptide length was 7 amino acids, the minimum Andromeda score for modified peptides was 40, and the minimum delta score was 6. Proteins that could not be differentiated based on MS/MS spectra alone were grouped to protein groups (default MaxQuant settings). Searches were performed with the label-free quantification option selected.

### ***RNA sequencing (RNAseq)***

RNA was isolated using ISOLATE II RNA Mini Kit (Bioline) according to the manufacturer's instructions with minor adjustments (10 min digestion using 20 µg proteinase K and a subsequent washing step using 100% ethanol were added after the lysis step). Sample quality and quantity was assessed using the 2100 Bioanalyzer with a RNA 6000 Pico Kit (Agilent), and Qubit Fluorometer with a HS RNA Assay (Thermo Fisher). After selecting the polyadenylated fraction of RNA, libraries were prepared using the NEXTflex™ Rapid RNA-seq Kit (Bioo Scientific). Libraries were sequenced on the Nextseq500 Illumina platform, producing 75 bp long single end reads. Reads were aligned to the human reference genome GRCh37 using STAR v2.4.2a<sup>60</sup>. Picard's AddOrReplaceReadGroups v1.98 (<http://broadinstitute.github.io/picard/>) was used to add read groups to the BAM files, which were sorted with Sambamba v0.4.5<sup>61</sup> and transcript abundances were quantified with HTSeq-count v0.6.1p1<sup>62</sup> using the union mode. Subsequently, reads per kilobase million reads sequenced (RPKM) were calculated with edgeR's RPKM function<sup>63</sup>. In order to obtain a list of differentially expressed genes between HCM and controls at false discovery rate (FDR) <0.05, we employed Deseq2 using Galaxy<sup>64, 65</sup>. The calculated p-values were calculated using Wald statistics and corrected for multiple testing using the Benjamini-Hochberg method. Statistics of the sequencing results can be found in *Table S6*. *Table S5* lists the RNA expression data of the genes that we detected at the protein level.

We applied Gene Set Enrichment Analysis<sup>66</sup> to examine the correlation between the proteomics data and the transcriptome profile revealed by RNA-seq. Briefly, differentially expressed genes (p-value <0.05) were included and ranked according to their fold change. The correlation between differentially regulated proteins and differentially expressed genes was assessed with the standard settings.

### ***Generation of the MYBPC3<sub>2373insG</sub> mouse model***

The MYBPC3<sub>2373insG</sub> mouse model was engineered using CRISPR/Cas9<sup>67</sup>. CRISPR guide RNAs, used for mouse Mybpc3 gene knock-in were designed using CRISPR.mit.edu. T guides were selected and produced by PCR using as the template Addgene pX330 plasmid (pX330-U6-Chimeric\_BB-CBh-

hSpCas9), carrying the scaffold portion of the guide. The forward primer consisted of a T7 promoter sequence and target sequence. A single guide RNA (sgRNA) was designed to target the following sequence in the *mybpc3* gene: GGACTCCTGCACTGTGCAGTGGG (PAM sequence in italic). sgRNA was made by in vitro transcription using Ambion's MEGAscript kit, and later purified with a MEGAclear kit. Commercial Cas9 mRNA was ordered from TriLink (L-6125, USA) and used for the embryo microinjection. Cas9 protein was ordered from PNA Bio (CP01-50, USA) and used to check cutting efficiency of the guides in vitro. Single strand donor oligonucleotides (ssODNs) with 60-80 bp homology to sequences on each side of the gRNA-mediated double-stranded break were designed and ordered from IDT. A silent mutation introducing RsaI restriction site in the oligo was created for genotyping purposes. Fertilized eggs were collected from the oviducts of super ovulated BL6/J females. Microinjection was performed by continuous flow injection of the Cas9/gRNA/ssODN mixture into the cytoplasm of 1-cell zygotes using the following final concentrations 100/50/200 ng/ul, respectively. Tail-tipping of the newborn mice was utilized to purify DNA for genotyping by PCR, employing two screening primers: forward, 5'- GTAAGGTAATCCGGTCTAGATAGC and reverse, 5'- ACTCGCATCTCATAGGCTACACC, producing 433bp band for the WT and two additional bands of 179bp and 254bp in the positive mice when restricted with RsaI.

#### *Measurement of calcium transients in intact MYBPC3<sup>2373insG</sup> cardiomyocytes*

In a subset of cardiomyocytes calcium transient measurements were performed. Cardiomyocytes were loaded with 1 $\mu$ M fura-2AM in culture medium for 15 minutes. After this cells were washed twice with tyrode solution. Calcium transients were measured after 30 minutes to allow for complete de-esterification. Calcium transients were recorded on the Ionoptix/CytoCypher MultiCell system (CytoCypher BV, the Netherlands) with a dual-excitation fluorescence photomultiplier system (IonOptix, Westwood, Massachusetts). A single cell was excited by rapidly switching between a 340nm and 385nm LED light source, fluorescence emission was then detected between 480-510nm and analyzed using CytoSolver software (CytoCypher BV, the Netherlands). An  $R^2 > 0.8$  for peak fit and  $> 0.9$  for recovery fit as well as a signal to noise ratio  $> 5$  was selected as inclusion criteria for calcium data. Because fura loading might influence contraction by buffering  $Ca^{2+}$ , we used cells that were not loaded for fura-2AM for the contractility measurements.

#### **Protein analysis**

For protein expression analysis by Western blot tissue lysates (whole tissue lysate for human and *MYBPC3<sup>2373insG</sup>* mice; cytosolic fraction lysate for *MYBPC3<sup>772G>A</sup>* mice) were prepared and proteins separated on a precast Bio-Rad Criterion TGX-gel and transferred to a polyvinylidene difluoride membrane. Site-specific antibodies directed to ERK (Cell Signaling, 9102S), phospho-ERK (Cell

Signaling, 4370S), AKT (Cell Signaling, 9272S), phospho-Ser473-AKT (Cell Signaling, 4060S),  $\alpha$ -tubulin (Sigma, T9026), tyrosinated tubulin (Sigma, T9028), detyrosinated tubulin (abcam, ab48389), desmin (Cell Signaling, 5332S) and GAPDH (Cell Signaling, 2118S; HyTest, 5G4 for *MYBPC3*<sub>772G>A</sub> mice) were used to detect the proteins which were visualized with an enhanced chemiluminescence detection kit (Amersham) and scanned with Amersham Imager 600 or with LI-COR near-infrared detection system. In the specific case of *MYBPC3*<sub>772G>A</sub> mice, antibodies directed against total- (clone  $\alpha$ -3A1), detyrosinated- (clone J63) and tyrosinated- (clone YL1/2)  $\alpha$ -tubulin were generously provided by Marie-Jo Moutin (Grenoble, France)<sup>56</sup>. Protein expression was determined by densitometric analysis. Protein expression was normalized to GAPDH or the total protein in case of phosphorylation-specific antibodies or total protein stain (TPS) with the LI-COR system.

### **Statistics**

Graphpad Prism v7 software was used for statistical analysis. Data (except proteomics and RNAseq data) were statistically analyzed with the Student's *t*-test when comparing 2 groups or 2way ANOVA with Tukey's multiple comparisons test when comparing more than one group. Data that did not pass the D'Agostino & Pearson normality test were analyzed with the non-parametric Mann-Whitney test when comparing two groups and Kruskal-Wallis test with Dunn's multiple comparisons test when comparing more than 2 groups. All values are shown as means  $\pm$  standard errors of the mean. Patient characteristics are reported as mean  $\pm$  standard deviation or median with interquartile range when appropriate. Categorical distributions are presented as frequencies and statistically analyzed with Fisher's exact test. A p-value  $\leq 0.05$  was considered as significantly different.

## Supplemental Tables

**Table S1:** Patient characteristics#. Dark grey row below each group shows mean±SD per group.

| Group                        | HCM      |     | Age at surgery | Mutation                           |       | LV parameters |                  |          |          |        |           | Diastolic parameters |                    |             | Diastolic dysfunction | Systolic parameters | Medication                    |
|------------------------------|----------|-----|----------------|------------------------------------|-------|---------------|------------------|----------|----------|--------|-----------|----------------------|--------------------|-------------|-----------------------|---------------------|-------------------------------|
|                              | ID       | Sex | (yrs)          | code                               | type  | LAD (mm)      | IVS (mm)         | EDD (mm) | ESD (mm) | FS (%) | E/A ratio | E/e' ratio           | TR velocity (cm/s) | stage (1-4) | LVOTO (mmHg)          |                     |                               |
|                              |          |     |                |                                    |       |               | IVS <sub>i</sub> |          |          |        |           |                      |                    |             |                       |                     |                               |
| MYBPC3 <sub>c.2373insG</sub> | 42       | M   | 32             | MYBPC3 c.2373insG/p.W792fs         | trunc | 47            | 23               | 13       | 43       | 16     | 63        | 1.03                 | 14.20              |             | 2                     | 64                  | bb, ccb                       |
|                              | 43       | M   | 60             | MYBPC3 c.2373insG/p.W792fs         | trunc | 52            | 23               |          | 45       | 29     | 36        | 2.00                 | 14.50              |             | 3                     | 77                  | bb, ccb                       |
|                              | 83       | M   | 17             | MYBPC3 c.2373insG/p.W792fs         | trunc |               |                  |          |          |        |           |                      |                    |             |                       |                     |                               |
|                              | 103      | M   | 26             | MYBPC3 c.2373insG/p.W792fs         | trunc | 47            | 20               | 9        | 47       | 25     | 47        | 1.33                 | 13.80              | 1.40        | 1                     | 13                  | bb, snri                      |
|                              | 104      | M   | 33             | MYBPC3 c.2373insG/p.W792fs         | trunc | 33            | 24               | 13       | 40       | 25     | 38        | 1.08                 | 8.90               | no          | 1                     | 31                  | bb                            |
|                              | 120      | M   | 27             | MYBPC3 c.2373insG/p.W792fs         | trunc | 39            | 24               | 13       | 37       | 19     | 49        | 1.42                 | 14.00              | 2.33        | 1                     | 61                  | bb                            |
|                              | 123      | F   | 59             | MYBPC3 c.2373insG/p.W792fs         | trunc | 45            | 21               |          | 55       |        |           | 1.20                 | 32.90              | 3.12        | 2                     | 64                  | bb, ccb, oac, diuretics, ACEi |
|                              | 159      | M   | 40             | MYBPC3 c.2373insG/p.W792fs         | trunc | 48            | 24               | 11       | 34       | 23     | 32        | 1.00                 | 17.90              | 2.47        | 1                     | 85                  | bb                            |
|                              | 169      | M   | 52             | MYBPC3 c.2373insG/p.W792fs         | trunc | 45            | 21               | 10       | 43       |        |           | 0.87                 | 15.90              | 2.27        | 1                     | 100                 | bb, ccb, haldol, vpa          |
|                              | 89% male |     | 38±15          |                                    |       | 45±6          | 23±2             | 2        | 43±6     | 23±5   | 44±11     | 1.24±0.36            | 16.51±7.09         | 2.32±0.61   | 2±1                   | 62±28               |                               |
| MYBPC3 <sub>other</sub>      | 34       | F   | 47             | MYBPC3 c.1790G>A/p.R597Q           | trunc | 46            | 20               | 10       | 42       | 18     | 57        | 2.00                 | 18.30              | 2.99        | 3                     | 38                  | bb, ccb, statin               |
|                              | 36       | M   | 22             | MYBPC3 c.927-2A>G                  | trunc | 60            | 30               |          | 44       | 19     | 57        | 0.73                 | 16.00              | no          | 1                     | 71                  | bb, ccb                       |
|                              | 47       | M   | 55             | MYBPC3 c.3407_3409del/p.Y1136del   | del   |               | 25               | 13       | 40       |        |           | 1.57                 | 21.00              | 2.88        | 2                     | 96                  | ccb                           |
|                              | 52       | F   | 24             | MYBPC3 c.2827C>T/p.R943X           | trunc | 44            | 24               | 14       | 35       | 16     | 54        | 1.12                 | 18.90              | 2.50        | 2                     | 34                  | bb                            |
|                              | 62       | M   | 36             | MYBPC3 c.772G>A/p.E258K            | trunc | 37            | 27               | 14       | 32       | 18     | 44        | 1.21                 | 10.80              | 1.80        | 1                     | 3                   | bb, diuretics, ACEi           |
|                              | 63       | M   | 33             | MYBPC3 c.2827C>T/p.R943X           | trunc | 40            | 21               | 12       | 46       | 20     | 57        | 2.38                 | 19.50              | no          | 3                     | 25                  | bb, ccb                       |
|                              | 71       | M   | 49             | MYBPC3 c.2827C>T/p.R943X           | trunc | 47            | 16               | 7        | 44       | 29     | 34        | 0.78                 | 10.20              | 2.30        | 1                     | 9                   | bb                            |
|                              | 113      | F   | 21             | MYBPC3 c.2434G>A,c.2827C>T/p.R943X | trunc | 43            | 45               | 28       | 40       |        |           | 1.26                 | 23.10              | 2.29        | 2                     | 27                  | bb, ccb                       |

|                          |     |      |       |                          |       |      |      |     |      |      |           |            |            |           |       |                              |                              |
|--------------------------|-----|------|-------|--------------------------|-------|------|------|-----|------|------|-----------|------------|------------|-----------|-------|------------------------------|------------------------------|
|                          | 116 | F    | 53    | MYBPC3 c.2827C>T/p.R943X | trunc |      |      |     |      |      |           |            |            |           |       |                              |                              |
|                          | 124 | M    | 53    | MYBPC3 c.2827C>T/p.R943X | trunc | 43   | 21   | 10  | 47   |      | 0.64      | 13.50      | 2.15       | 1         | 41    | bb                           |                              |
|                          |     |      |       |                          |       |      |      | 10  |      |      |           |            |            |           |       | bb, oac, statin, ppi, NaSSA, |                              |
|                          | 133 | M    | 58    | MYBPC3 c.442G>A/p.G148R  | mis   | 44   | 21   |     | 40   | 30   | 25        | 0.86       | 12.50      | 2.42      | 1     | 19                           | ssri                         |
|                          |     | 64%  |       |                          |       |      |      | 13± |      |      |           |            |            |           |       |                              |                              |
|                          |     | male | 41±14 |                          |       | 45±6 | 25±8 | 6   | 41±5 | 21±6 | 47±13     | 1.26±0.58  | 16.38±4.46 | 2.42±0.38 | 2±1   | 36±28                        |                              |
| MYH7                     | 27  | F    | 58    | MYH7 c.4130C>T/p.T1377M  | mis   | 48   | 20   | 13  |      |      |           |            | 2.80       |           |       | 100                          | bb                           |
|                          | 42B | F    | 46    | MYH7 c.1816G>A/p.V606M   | mis   | 51   | 20   | 9   |      |      |           | 3.38       | 20.30      | 2.60      | 3     | 77                           | bb, ccb                      |
|                          | 80  | M    | 34    | MYH7 c.1291G>C/p.V431L   | mis   |      | 17   | 8   | 45   |      |           | 1.45       | 14.30      | 1.41      | 1     | 85                           | bb, ccb                      |
|                          | 92  | M    | 66    | MYH7 c.2685A>C/p.Q895H   | mis   |      |      |     |      |      |           |            |            |           |       |                              |                              |
|                          | 106 | M    | 35    | MYH7 c.2783A>T/p.D928V   | mis   |      | 16   | 8   | 47   |      |           | 0.93       | 11.50      | 2.06      | 1     | 16                           | bb                           |
|                          | 114 | M    | 69    | MYH7 c.976G>C/p.A326P    | mis   | 43   | 19   |     | 33   |      |           | 0.60       | 12.90      | 2.14      | 1     | 71                           | bb, statin, asa              |
|                          | 119 | M    | 41    | MYH7 c.3367G>A/p.E1233K  | mis   | 56   | 20   | 9   |      |      |           | 1.26       | 20.40      | 1.40      | 2     | 81                           | bb                           |
|                          |     |      |       |                          |       |      |      | 9   |      |      |           |            |            |           |       |                              | bb, statin, ppi, amiodaron,  |
|                          | 130 | M    | 72    | MYH7 c.976G>C/p.A326P    | mis   | 42   | 18   |     | 50   |      |           | 2.60       | 18.60      | 3.30      | 3     | 27                           | noac, metformin              |
|                          | 131 | F    | 52    | MYH7 c.1987C>T/p.R663C   | mis   | 52   | 21   | 10  | 43   |      |           |            |            | no        |       | 41                           | bb, statin, asa              |
|                          | 166 | F    | 66    | MYH7 c.2080C>T/p.R694C   | mis   | 41   | 16   |     |      |      | 0.79      | 32.40      | no         | 2         | 41    | bb, ccb, asa, pregabalin     |                              |
|                          |     | 60%  |       |                          |       |      |      | 10± |      |      |           |            |            |           |       |                              |                              |
|                          |     | male | 54±14 |                          |       | 48±6 | 19±2 | 2   | 44±6 |      | 1.57±1.03 | 18.63±7.05 | 2.24±0.71  | 2±1       | 60±29 |                              |                              |
| Other (TNNI3/TNNT2/MYL2) | 55  | M    | 46    | TNNI3 c.433C>T/p.R145W   | mis   | 64   | 23   | 11  | 42   | 23   | 45        | 1.09       | 26.70      | no        | 2     | 100                          | bb                           |
|                          | 88  | F    | 57    | MYL2 c.401A>C/p.E134A    | mis   |      |      |     |      |      |           |            |            |           |       |                              |                              |
|                          | 132 | F    | 15    | TNNT2 c.814C>T/p.Q272*   | trunc | 37   | 19   | 13  | 39   | 16   | 59        | 2.33       | 17.50      | 1.99      | 3     | 81                           | bb                           |
|                          | 135 | M    | 68    | MYL2 c.64G>A/p.E22K      | mis   | 43   | 16   |     | 48   |      |           | 1.20       | 10.00      |           | 2     | 23                           |                              |
|                          | 163 | F    | 64    | TNNI3 c.433C>T/p.R145W   | mis   | 46   | 23   | 12  | 42   |      |           | 0.52       | 16.30      | no        | 1     | 125                          | bb, asa, thyroxine           |
|                          | 164 | M    | 0.2   | MYL2                     |       |      |      |     |      |      |           |            |            |           |       |                              |                              |
|                          |     |      |       |                          |       |      |      |     |      |      |           |            |            |           |       |                              | bb, ccb, oac, ppi, diuretic, |
|                          | 170 | F    | 69    | TNNI3 c.433C>T/p.R145W   | mis   | 47   | 22   |     | 41   |      |           | 0.78       | 36.80      | 2.02      | 2     | 36                           | pcm                          |
|                          | 173 | M    | 58    | TNNT2 c.832C>T/p.R278C   | mis   | 51   | 18   |     | 40   |      | 62        | 2.04       | 16.60      | 2.70      | 3     | 74                           | non                          |
|                          |     |      |       |                          |       |      | 8    |     |      |      |           |            |            |           |       | bb, asa, diuretics,          |                              |
|                          | 175 | M    | 61    | TNNT2 c.832C>T/p.R278C   | mis   | 46   | 16   |     | 50   |      | 0.75      | 12.50      | 2.25       | 1         | 31    | clopidogrel, statin          |                              |



| 56%<br>male 49±25  |      |   |    |                    | 11±  |      |     |      |      |      | 1.24±0.69 19.49±9.25 2.24±0.33 |       |   | 2±1 | 67±38                                                               |     |
|--------------------|------|---|----|--------------------|------|------|-----|------|------|------|--------------------------------|-------|---|-----|---------------------------------------------------------------------|-----|
|                    |      |   |    |                    | 48±8 | 20±3 | 2   | 43±4 | 20±5 | 55±9 |                                |       |   |     |                                                                     |     |
| HCM <sub>SMN</sub> | 40   | M | 22 | SMN (48 genes NGS) | 54   | 15   | 7   | 53   | 28   | 47   | 47.30                          |       |   | 3   | 100                                                                 | ccb |
|                    | 90   | M | 53 | SMN (48 genes NGS) | 41   | 17   | 9   | 46   | 24   | 48   | 1.03                           |       |   |     | 61                                                                  | bb  |
|                    | 100  | M | 41 | SMN (48 genes NGS) | 49   | 15   |     |      |      |      | 0.62                           | 14.80 | 1 | 81  | bb, ACEi, asa, ppi,<br>gembrofizill, insulin,<br>metformin, nitrate |     |
|                    | 105  | M | 65 | SMN (48 genes NGS) | 54   | 16   | 7   |      |      |      | 1.10                           | 22.90 | 2 | 49  | oac, amiodaron, statin                                              |     |
|                    | 109  | F | 71 | SMN (48 genes NGS) | 52   | 20   | 10  |      |      |      | 1.30                           | 33.60 | 2 | 130 | bb, asa, ATII-i, ppi, nitrate,<br>statin                            |     |
|                    | 117  | F | 50 | SMN (48 genes NGS) | 50   | 16   | 10  |      |      |      | 0.80                           | 24.70 | 1 | 159 | bb, ccb, asa, ezetrol,<br>calcichew                                 |     |
|                    | 125  | M | 66 | SMN (48 genes NGS) | 45   | 18   | 9   | 45   |      |      | 2.68                           | 15.20 | 3 | 132 | bb, oac                                                             |     |
|                    | 126  | F | 64 | SMN (48 genes NGS) |      | 15   | 9   | 34   |      |      | 0.61                           | 17.40 | 1 | 104 | bb                                                                  |     |
|                    | 156  | F | 54 | SMN (48 genes NGS) | 39   | 15   | 6   | 47   |      |      | 0.83                           | 33.30 | 2 | 108 | bb, ccb, ppi, ACEi, diuretic,<br>ssri                               |     |
|                    | 168  | M | 46 | SMN (48 genes NGS) | 49   | 15   | 7   | 41   |      |      | 1.00                           | 20.40 | 2 |     | ccb, foster, aeries                                                 |     |
|                    | 172  | M | 57 | SMN (48 genes NGS) |      | 20   |     |      |      |      | 0.68                           | 16.20 | 1 | 21  | ccb, ATII-i, insulin                                                |     |
| 64%<br>male 54±14  |      |   |    |                    | 48±5 | 17±2 | 8±1 | 44±6 | 26±3 | 48±1 | 1.07±0.61 24.58±10.54          |       |   | 2±1 | 95±42                                                               |     |
| NF <sub>VS</sub>   | 5033 | F | 48 |                    |      |      |     |      |      |      |                                |       |   |     |                                                                     |     |
|                    | 5126 | F | 55 |                    |      |      |     |      |      |      |                                |       |   |     |                                                                     |     |
|                    | 6008 | M | 40 |                    |      |      |     |      |      |      |                                |       |   |     |                                                                     |     |
|                    | 6028 | F | 62 |                    |      |      |     |      |      |      |                                |       |   |     |                                                                     |     |
|                    | 6056 | F | 42 |                    |      |      |     |      |      |      |                                |       |   |     |                                                                     |     |
|                    | 7040 | M | 37 |                    |      |      |     |      |      |      |                                |       |   |     |                                                                     |     |
|                    | 7054 | M | 33 |                    |      |      |     |      |      |      |                                |       |   |     |                                                                     |     |
|                    | 8004 | F | 50 |                    |      |      |     |      |      |      |                                |       |   |     |                                                                     |     |
| 38%<br>male 46±10  |      |   |    |                    |      |      |     |      |      |      |                                |       |   |     |                                                                     |     |

# The table is showing the exact mutation, including mutation type (missense (mis), truncation (trunc) or deletion (del)), per sample. Furthermore it presents the left ventricular (LV) parameters left atrial diameter (LAD), interventricular septum thickness (IVS), indexed interventricular septum thickness (IVS<sub>i</sub>), which is corrected for body surface area, end-diastolic diameter (EDD), end-systolic diameter (ESD) and fractional shortening (FS) as well as the diastolic parameters E/A ratio, E/e' ratio and TR velocity. The table also displays the stage of diastolic dysfunction, the systolic left ventricular outflow tract obstruction gradient (LVOTO) and information about the patient's medication (beta-blocker (bb), calcium channel blocker (ccb), serotonin-norepinephrine reuptake inhibitor (snri), oral anti-coagulant (oac), diuretics, angiotensin-converting enzyme inhibitor (ACEi), valproic acid (vpa), proton pump inhibitor (ppi), noradrenergic and specific serotonergic antidepressant (NaSSA), selective serotonin reuptake inhibitor (ssri), acetylsalicylic acid (asa), non-vitamin k oral anticoagulant (noac), paracetamol (pcm), angiotensin-II receptor inhibitor (ATII-i), next-generation sequencing (NGS).

**Table S2:** Descriptive matrix of the different group comparisons.

| <b>Total n proteins identified</b>      |                    | 3811                          |                    |                      |
|-----------------------------------------|--------------------|-------------------------------|--------------------|----------------------|
| <b>Total n proteins after filtering</b> |                    | 2127                          |                    |                      |
| <b>Group comparison</b>                 |                    | <b>n proteins (p&lt;0.05)</b> |                    |                      |
|                                         |                    | <b>total</b>                  | <b>upregulated</b> | <b>downregulated</b> |
| MYBPC3 <sub>2373insG</sub>              | NF <sub>IVS</sub>  | 340                           | 138                | 202                  |
| MYBPC3 <sub>other</sub>                 | NF <sub>IVS</sub>  | 480                           | 190                | 290                  |
| MYH7                                    | NF <sub>IVS</sub>  | 402                           | 137                | 265                  |
| HCM <sub>SMN</sub>                      | NF <sub>IVS</sub>  | 381                           | 128                | 253                  |
| Other                                   | NF <sub>IVS</sub>  | 336                           | 160                | 176                  |
| HCM <sub>SMP</sub>                      | HCM <sub>SMN</sub> | 44                            | 36                 | 11                   |
| HCM <sub>SMP</sub>                      | NF <sub>IVS</sub>  | 511                           | 189                | 322                  |
| HCM <sub>all</sub>                      | NF <sub>IVS</sub>  | 529                           | 187                | 342                  |

**Table S3:** Expression of expected deregulated proteins in HCM patient tissue.

| Category    | Protein description                   | Gene symbol | Mean normalized count |                    | Fold change | p value |
|-------------|---------------------------------------|-------------|-----------------------|--------------------|-------------|---------|
|             |                                       |             | NF <sub>IVS</sub>     | HCM <sub>all</sub> |             |         |
| ECM         | Fibronectin 1                         | FN1         | 29.2                  | 46.0               | 1.57        | 0.0183  |
| ECM         | Thrombospondin-4                      | THBS4       | 7.4                   | 31.9               | 4.33        | <0.0001 |
| ECM         | Periostin                             | POSTN       | 6.8                   | 141.3              | 20.91       | <0.0001 |
| Hypertrophy | Four and a half LIM domains protein 2 | FHL2        | 178.6                 | 136.7              | -1.31       | 0.0006  |
| Hypertrophy | Myosin heavy chain 6                  | MYH6        | 124.6                 | 52.2               | -2.39       | <0.0001 |
| Hypertrophy | Cysteine and glycine-rich protein 3   | CSRP3       | 81.0                  | 97.2               | 1.20        | 0.0008  |

**Table S4:** Expression of MYBPC3 in the *MYBPC3*<sub>2373insG</sub> patient group.

| Category    | Protein description                    | Gene symbol | Mean normalized count |                                   | Fold change | p value |
|-------------|----------------------------------------|-------------|-----------------------|-----------------------------------|-------------|---------|
|             |                                        |             | NF <sub>IVS</sub>     | <i>MYBPC3</i> <sub>2373insG</sub> |             |         |
| Myofilament | Myosin-binding protein C, cardiac-type | MYBPC3      | 760.3                 | 639.6                             | -1.19       | 0.0005  |

**Table S6:** Statistics of RNA sequencing results.

| <b>Group</b> | <b>Sample ID</b> | <b>Run</b> | <b>Total number of reads</b> | <b>Number of gene with at least 1 read</b> | <b>Number of genes with at least 10 reads</b> | <b>Percentage of mRNA bases</b> |
|--------------|------------------|------------|------------------------------|--------------------------------------------|-----------------------------------------------|---------------------------------|
| SMP          | HCM104           | 2          | 12554384                     | 12095                                      | 9990                                          | 21,67%                          |
| SMP          | HCM120           | 2          | 13988528                     | 6676                                       | 5402                                          | 8,18%                           |
| SMP          | HCM124           | 3          | 15375893                     | 14775                                      | 10774                                         | 16,09%                          |
| SMP          | HCM130           | 2          | 16267099                     | 12720                                      | 8466                                          | 6,92%                           |
| SMP          | HCM133           | 1          | 14473822                     | 13297                                      | 9383                                          | 12,96%                          |
| SMP          | HCM159           | 3          | 15262767                     | 14176                                      | 10027                                         | 13,32%                          |
| SMP          | HCM163           | 1          | 20784562                     | 14387                                      | 12646                                         | 23,67%                          |
| SMP          | HCM166           | 2          | 11685010                     | 6423                                       | 5187                                          | 9,24%                           |
| SMP          | HCM169           | 3          | 15482131                     | 13476                                      | 9686                                          | 14,93%                          |
| SMP          | HCM173           | 3          | 13933213                     | 13989                                      | 9134                                          | 12,53%                          |
| SMP          | HCM175           | 1          | 19231230                     | 17365                                      | 13168                                         | 44,63%                          |
| SMP          | HCM27            | 1          | 23603136                     | 16725                                      | 12428                                         | 30,91%                          |
| SMP          | HCM42B           | 3          | 15751613                     | 14994                                      | 10733                                         | 20,92%                          |
| SMP          | HCM43            | 1          | 19091911                     | 17260                                      | 13007                                         | 32,96%                          |
| SMP          | HCM52            | 2          | 28426211                     | 9836                                       | 8213                                          | 8,71%                           |
| SMP          | HCM55            | 1          | 43944540                     | 18687                                      | 14354                                         | 33,11%                          |
| SMP          | HCM62            | 2          | 17435209                     | 9500                                       | 7648                                          | 10,04%                          |
| SMP          | HCM63            | 3          | 9504043                      | 13846                                      | 9756                                          | 19,79%                          |
| SMP          | HCM71            | 3          | 18548295                     | 14758                                      | 10745                                         | 13,89%                          |
| SMP          | HCM80            | 1          | 24403651                     | 16984                                      | 12850                                         | 26,25%                          |

|     |          |   |          |       |       |        |
|-----|----------|---|----------|-------|-------|--------|
| SMP | HCM88    | 3 | 24393084 | 15553 | 11568 | 14,50% |
| SMP | HCM92    | 1 | 19953132 | 17122 | 13012 | 29,97% |
| SMN | HCM105   | 1 | 19936992 | 17150 | 13224 | 44,38% |
| SMN | HCM126   | 2 | 11706747 | 13841 | 9213  | 11,93% |
| SMN | HCM156   | 2 | 17999842 | 14374 | 10143 | 11,22% |
| SMN | HCM168   | 3 | 15980714 | 14325 | 9753  | 14,42% |
| SMN | HCM172   | 3 | 15979548 | 14596 | 10788 | 17,21% |
| SMN | HCM40    | 1 | 23610820 | 16624 | 12612 | 30,24% |
| SMN | HCM90    | 1 | 22301135 | 17517 | 13330 | 34,55% |
| NF  | D6056IVS | 2 | 19127904 | 12675 | 9379  | 9,34%  |
| NF  | D7054IVS | 2 | 13978089 | 14115 | 9978  | 12,60% |
| NF  | D8004IVS | 3 | 17777029 | 14827 | 10542 | 14,73% |
| NF  | D5033IVS | 1 | 13060130 | 16222 | 12191 | 47,24% |
| NF  | D5126IVS | 1 | 27626362 | 18097 | 13637 | 46,85% |

## **Supplemental Figures**



Figure S1

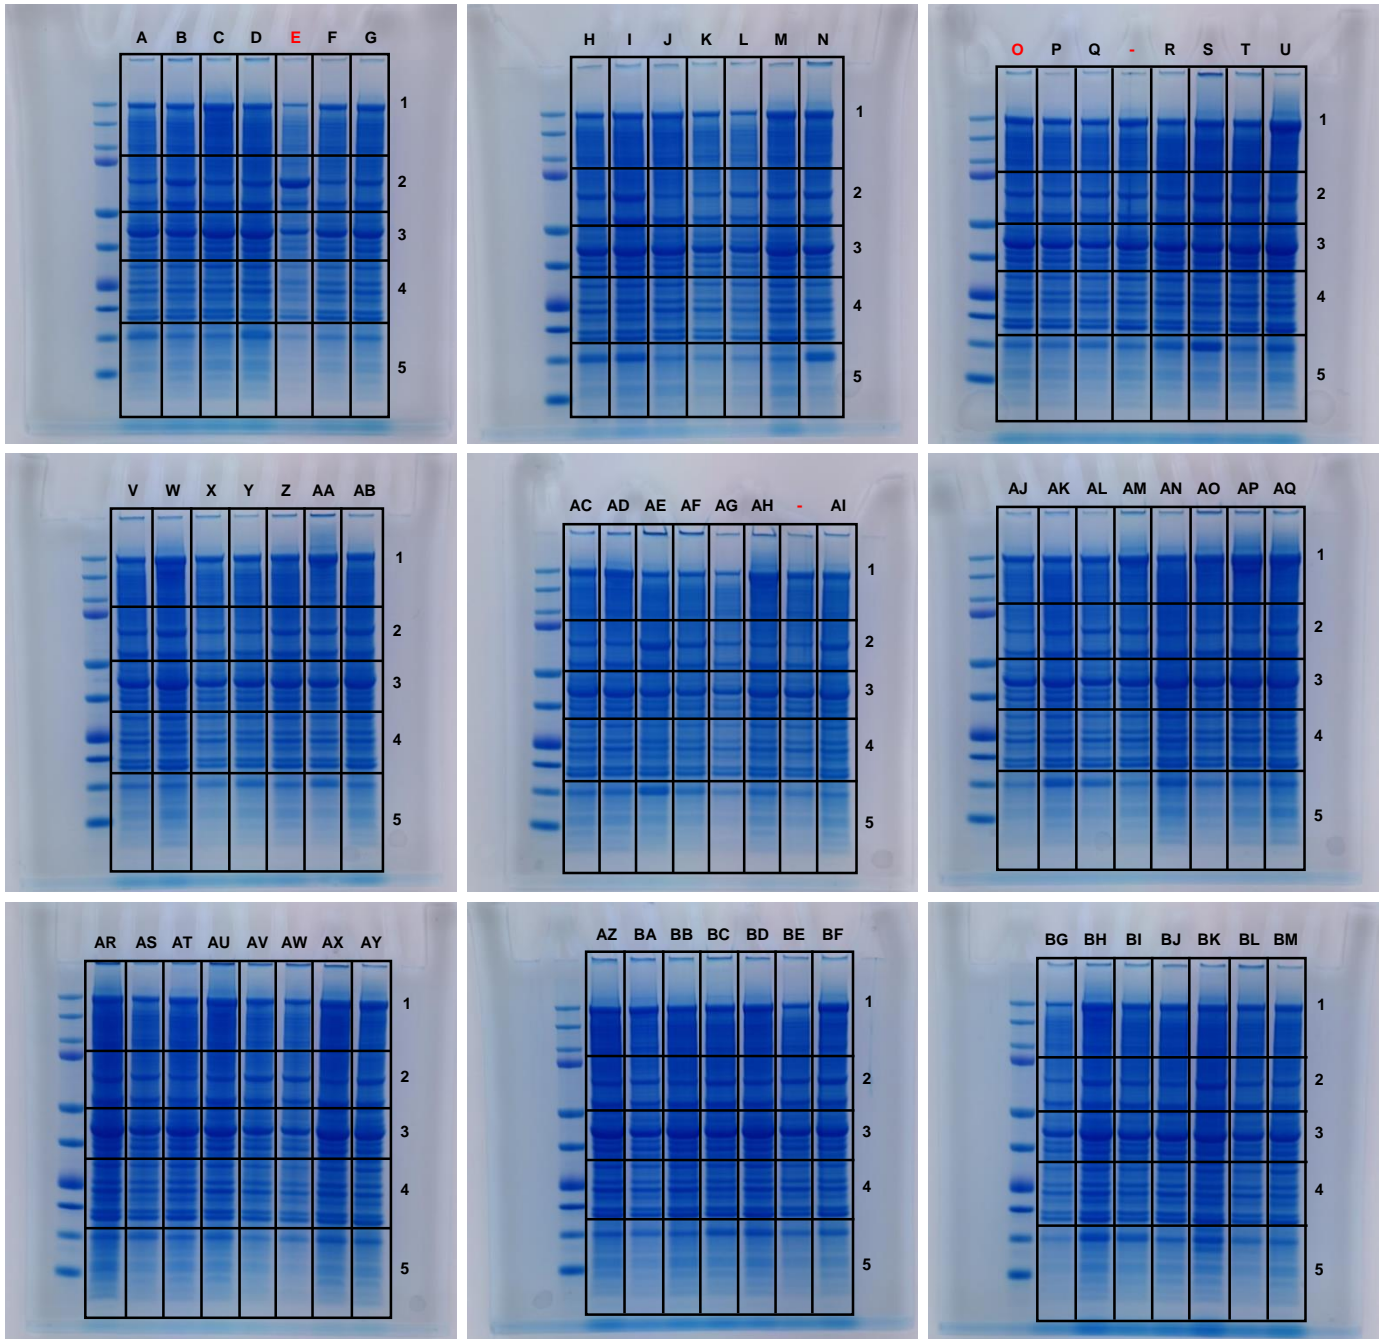

**Figure S1:** Images of gels that were used for proteomics experiment with slicing scheme. Samples E and O (marked in red) were excluded from analysis.

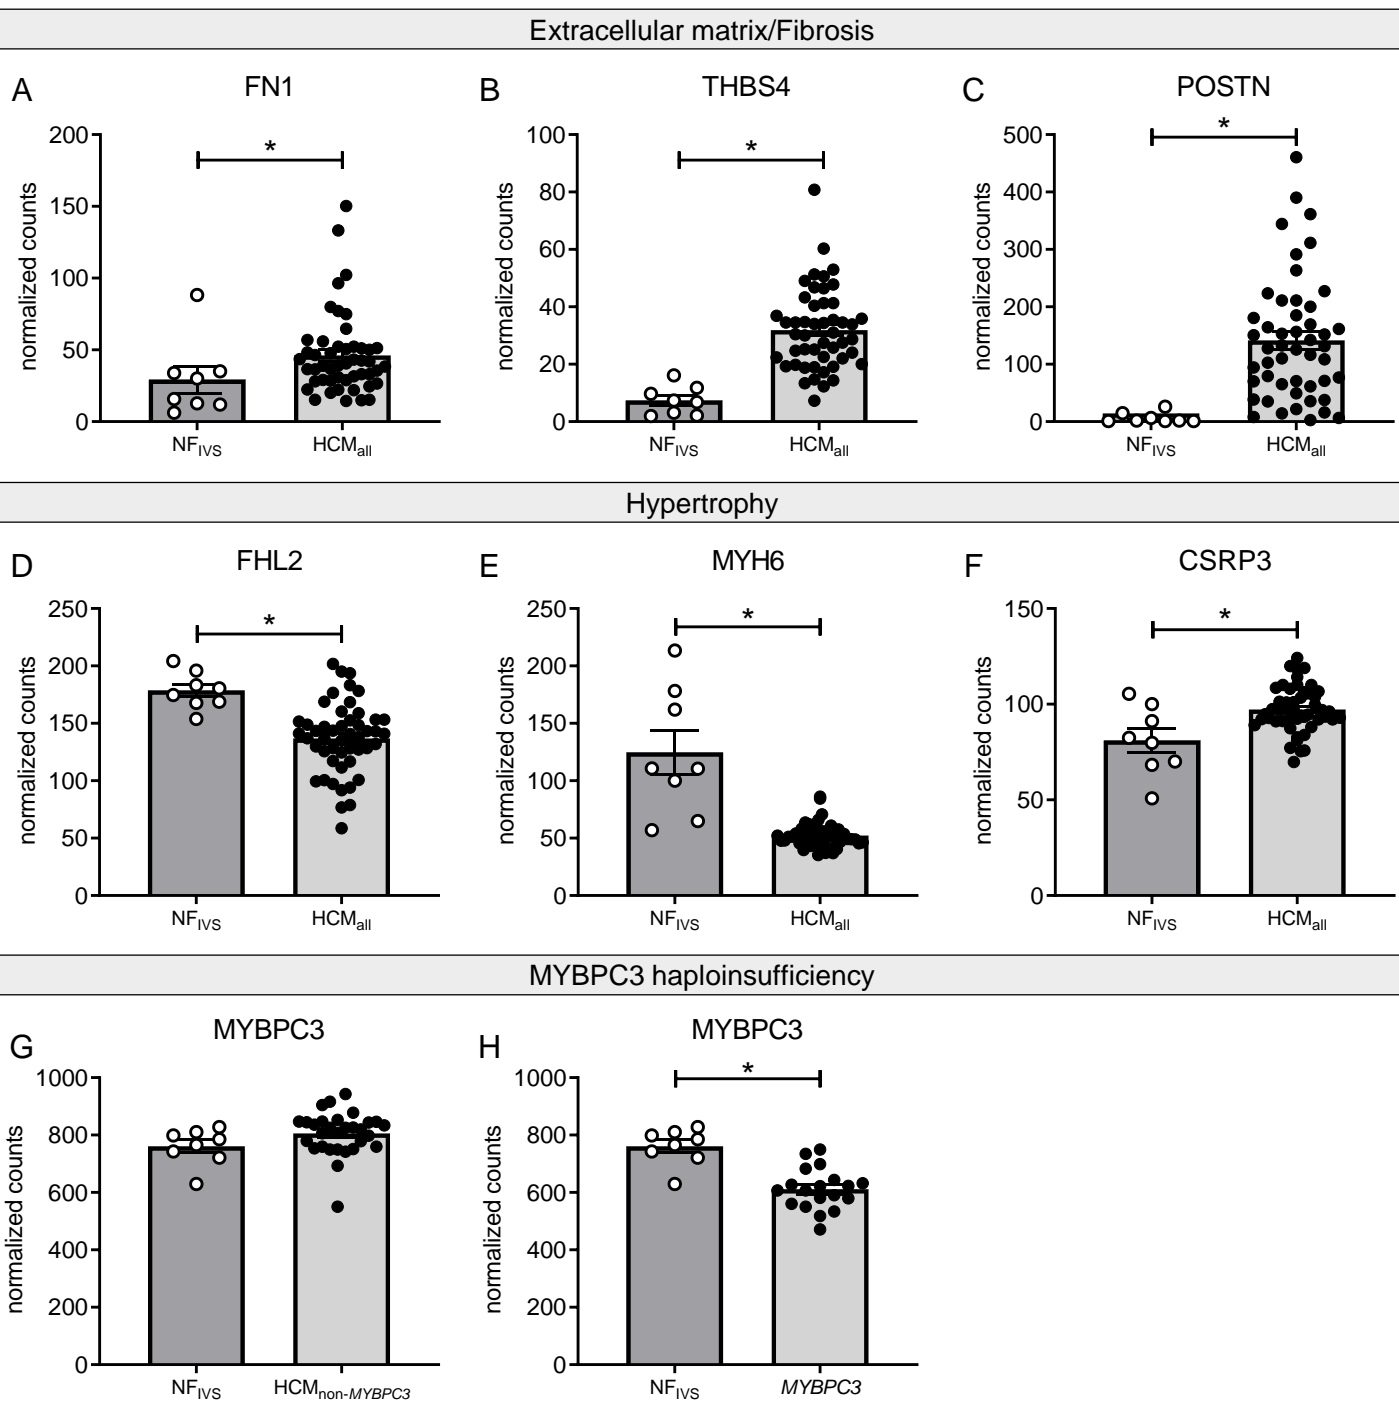

**Figure S2:** Validation of proteomics analysis with known target proteins. (A-C) show protein expression data of the extracellular matrix proteins FN1, THBS4 and POSTN. (D-F) show protein expression data of the hypertrophy related proteins FHL2, MYH6 and CSRP3. (G) shows expression of MYBPC3 in HCM samples without a mutation in MYBPC3 and (H) with a mutation in MYBPC3. \*  $p < 0.05$  (beta-binomial statistics from the proteomics analysis).

A

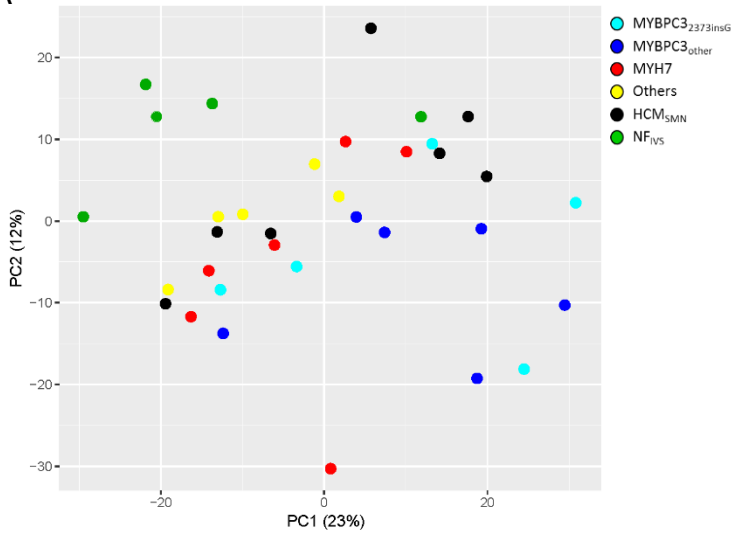

B

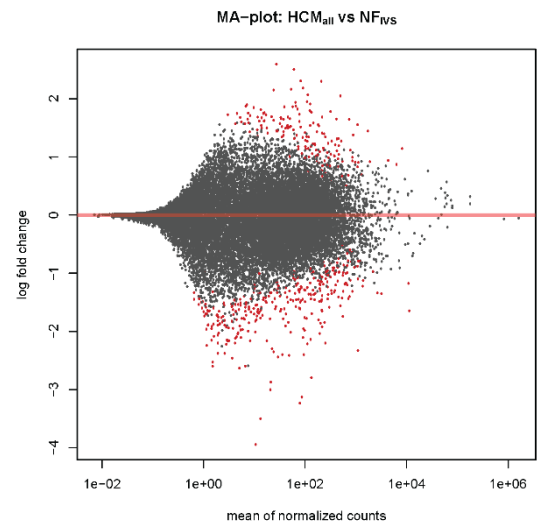

C

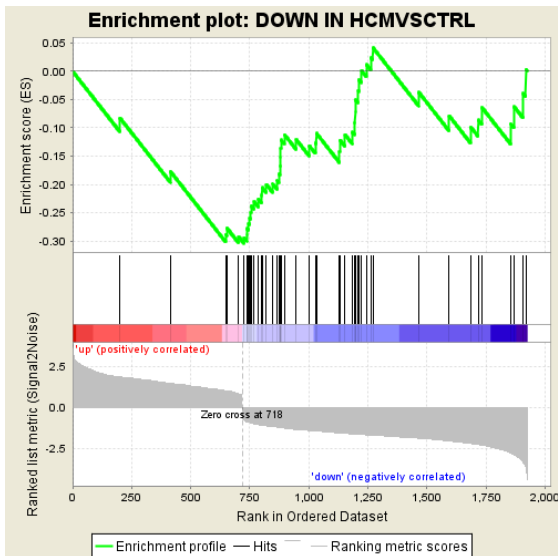

D

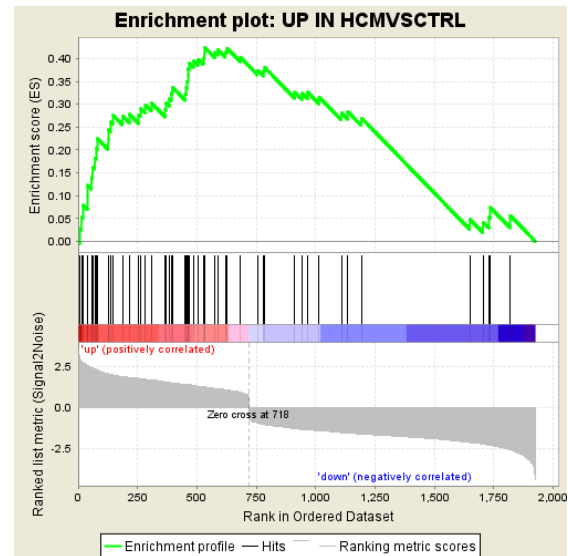

**Figure S3:** RNA sequencing results. (A) PCA plot of RNA sequencing data shows separate clustering of HCM<sub>all</sub> and NF<sub>IVS</sub> samples. (B) MA-plot showing all genes with differentially expressed genes between HCM<sub>all</sub> and NF<sub>IVS</sub> depicted in red. Gene set enrichment analysis of downregulated (C) and upregulated (D) proteins and mRNAs shows overall correlation of proteomics and transcriptomics data.

Downregulated proteins

HCM<sub>all</sub> vs NF<sub>IVS</sub>

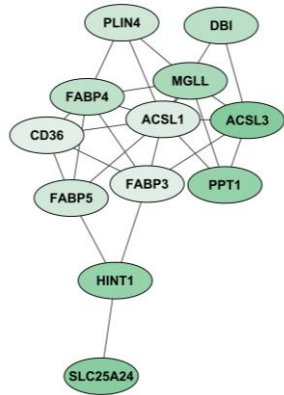

11. Long-chain fatty acid transport  
(GO: 15909)  
12 nodes (p=1.3609E-10)

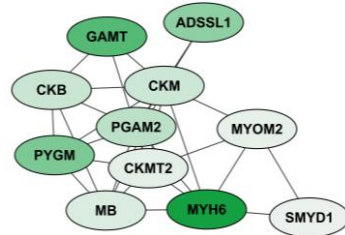

12. Creatine metabolic process  
(GO: 6600)  
11 nodes (p=2.6955E-12)

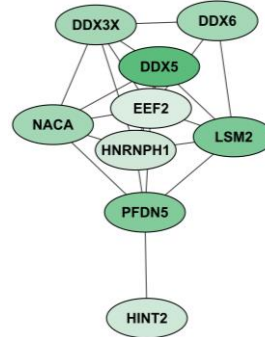

13. Stress granule assembly  
(GO: 34063)  
9 nodes (p=2.0897E-5)

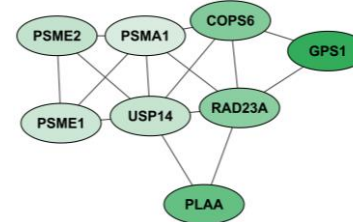

14. Protein modification by small  
protein removal  
(GO: 70646)  
8 nodes (p=2.3649E-12)

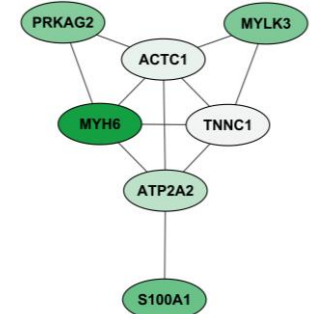

15. Protein folding  
(GO: 6457)  
7 nodes (p=6.0330E-9)

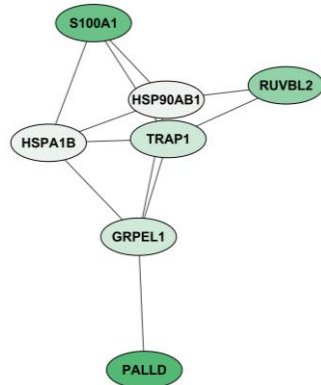

16. Striated muscle contraction  
(GO: 6941)  
7 nodes (p=4.1621E-8)

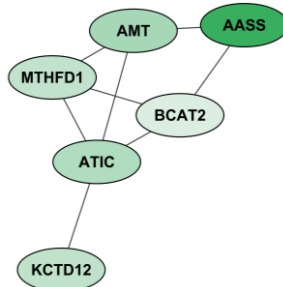

17. Alpha-amino acid metabolic  
process  
(GO: 1901605)  
6 nodes (p=2.6064E-7)

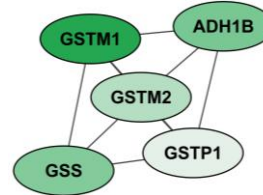

18. Glutathione metabolic process  
(GO: 6749)  
5 nodes (p=3.9743E-10)

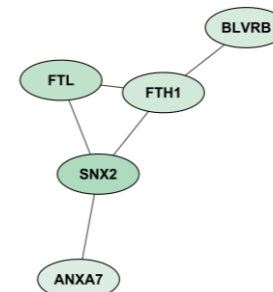

19. Intracellular sequestering  
of iron ion  
(GO: 6880)  
5 nodes (p=9.3541E-7)

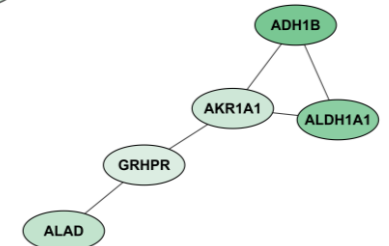

20. Cellular aldehyde  
metabolic process  
(GO: 6081)  
5 nodes (p=2.5821E-7)

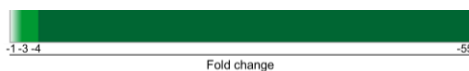

**Figure S4:** HCM-specific changes in biological processes in downregulated proteins. Extended version of Figure 2A. The color gradient from light to dark indicates an increase in fold change.

Figure S5

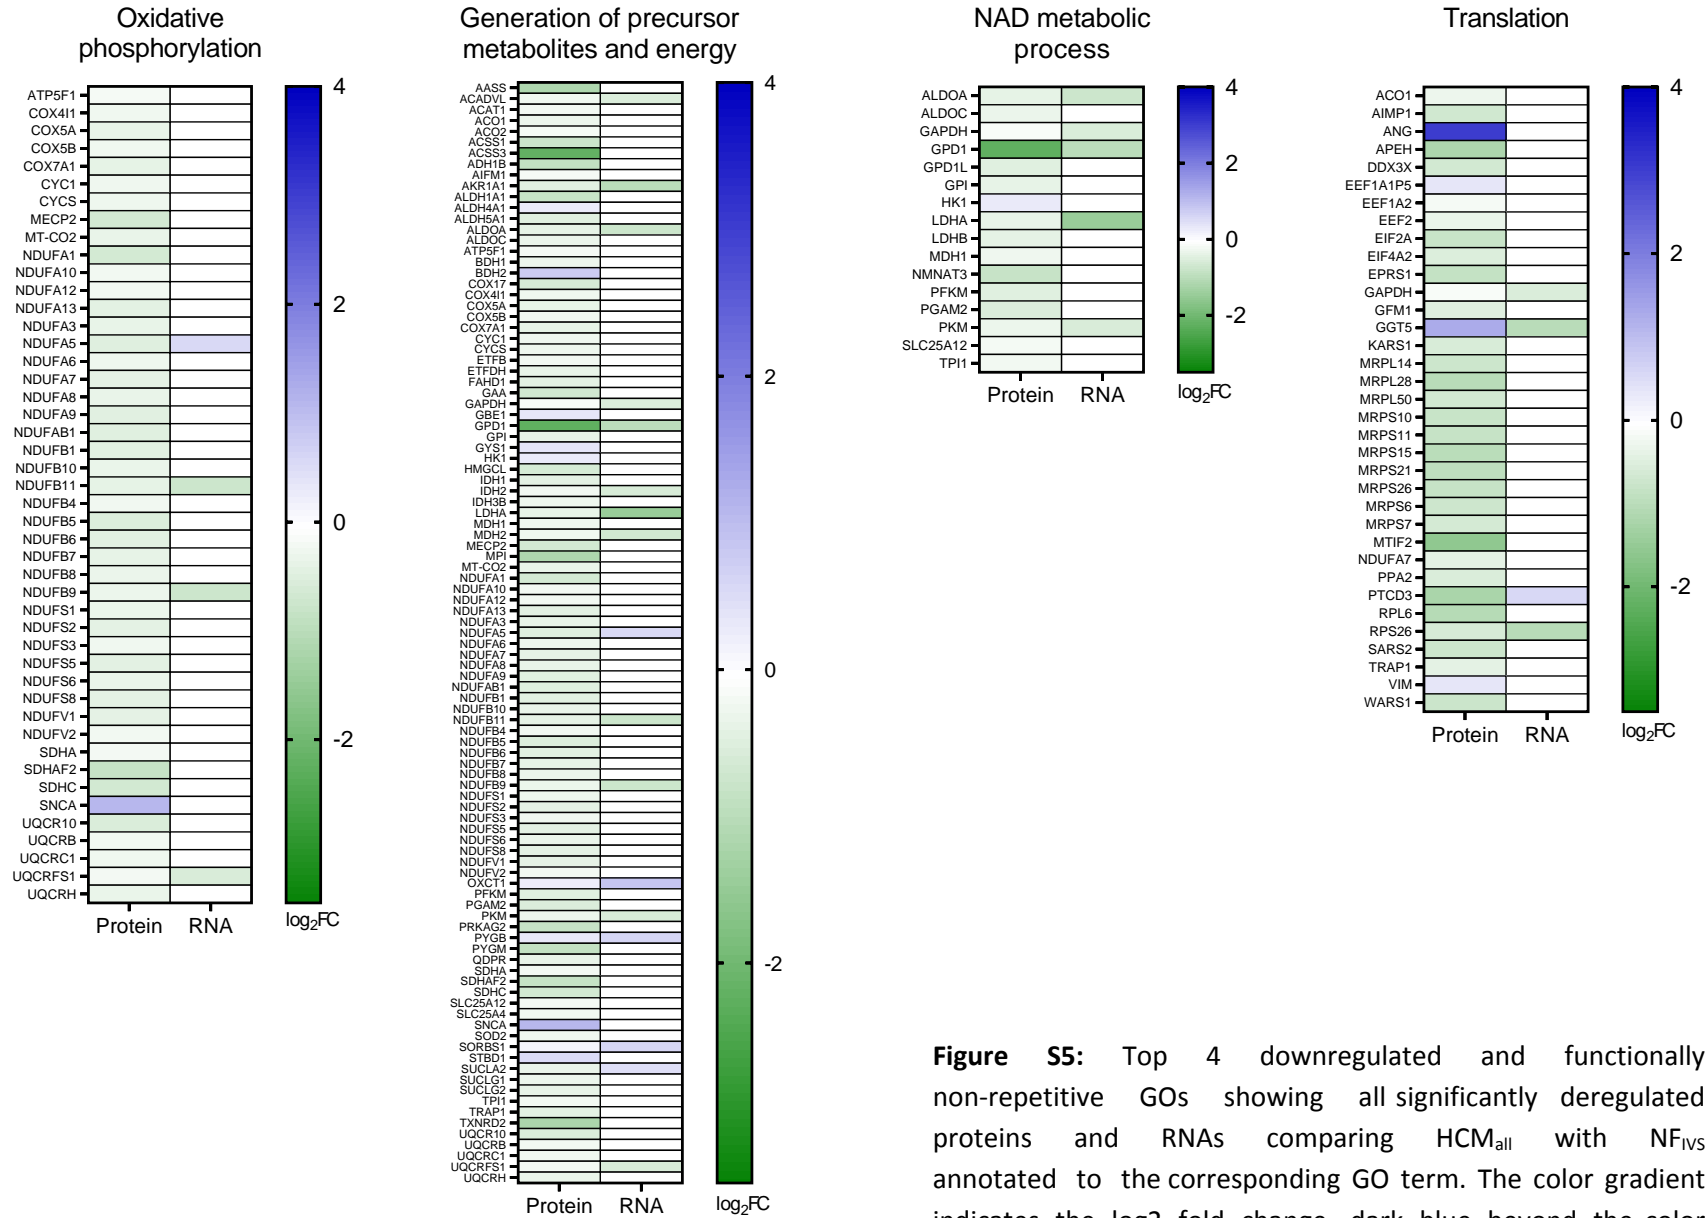

**Figure S5:** Top 4 downregulated and functionally non-repetitive GOs showing all significantly deregulated proteins and RNAs comparing HCM<sub>all</sub> with NF<sub>IVS</sub> annotated to the corresponding GO term. The color gradient indicates the log<sub>2</sub> fold change, dark blue beyond the color scale indicates a log<sub>2</sub> fold change >4.

**Upregulated proteins**  
HCM<sub>all</sub> vs NF<sub>IVS</sub>

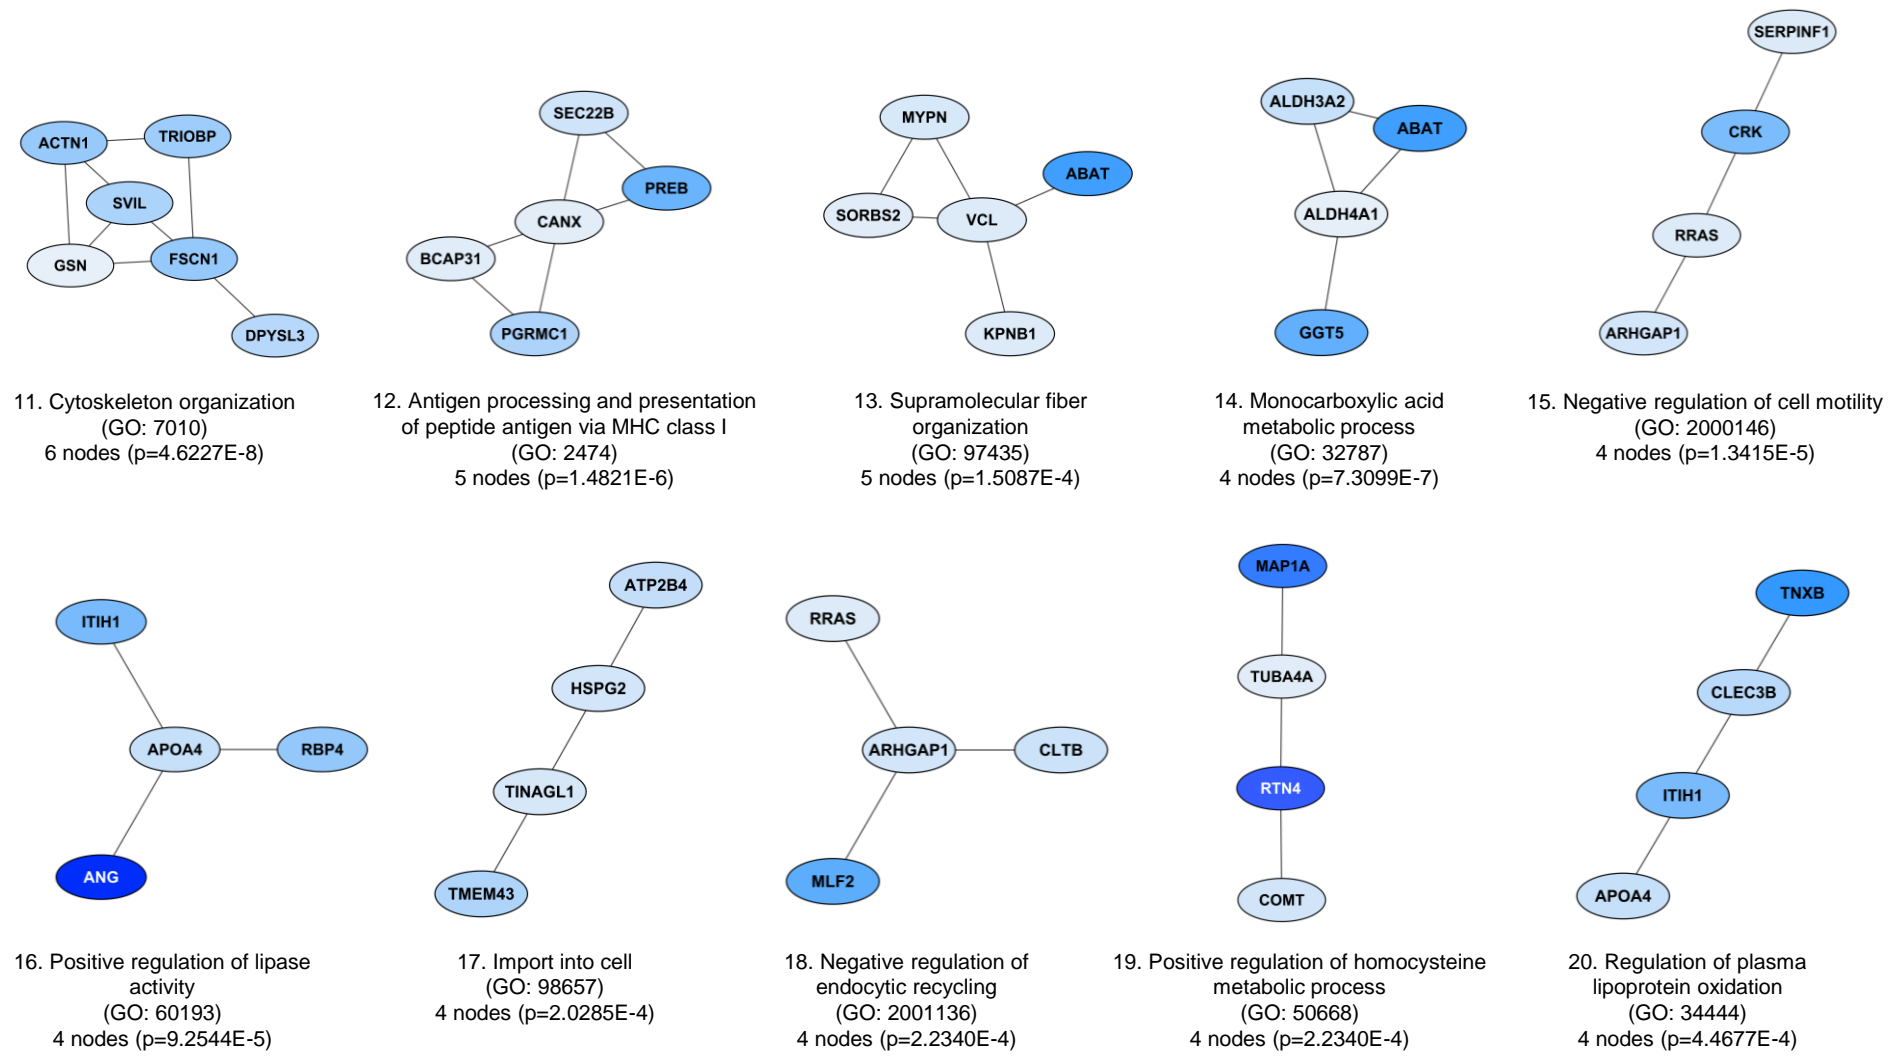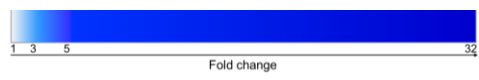

**Figure S6:** HCM-specific changes in biological processes in upregulated proteins. Extended version of Figure 2B. The color gradient from light to dark indicates an increase in fold change.

Figure S7

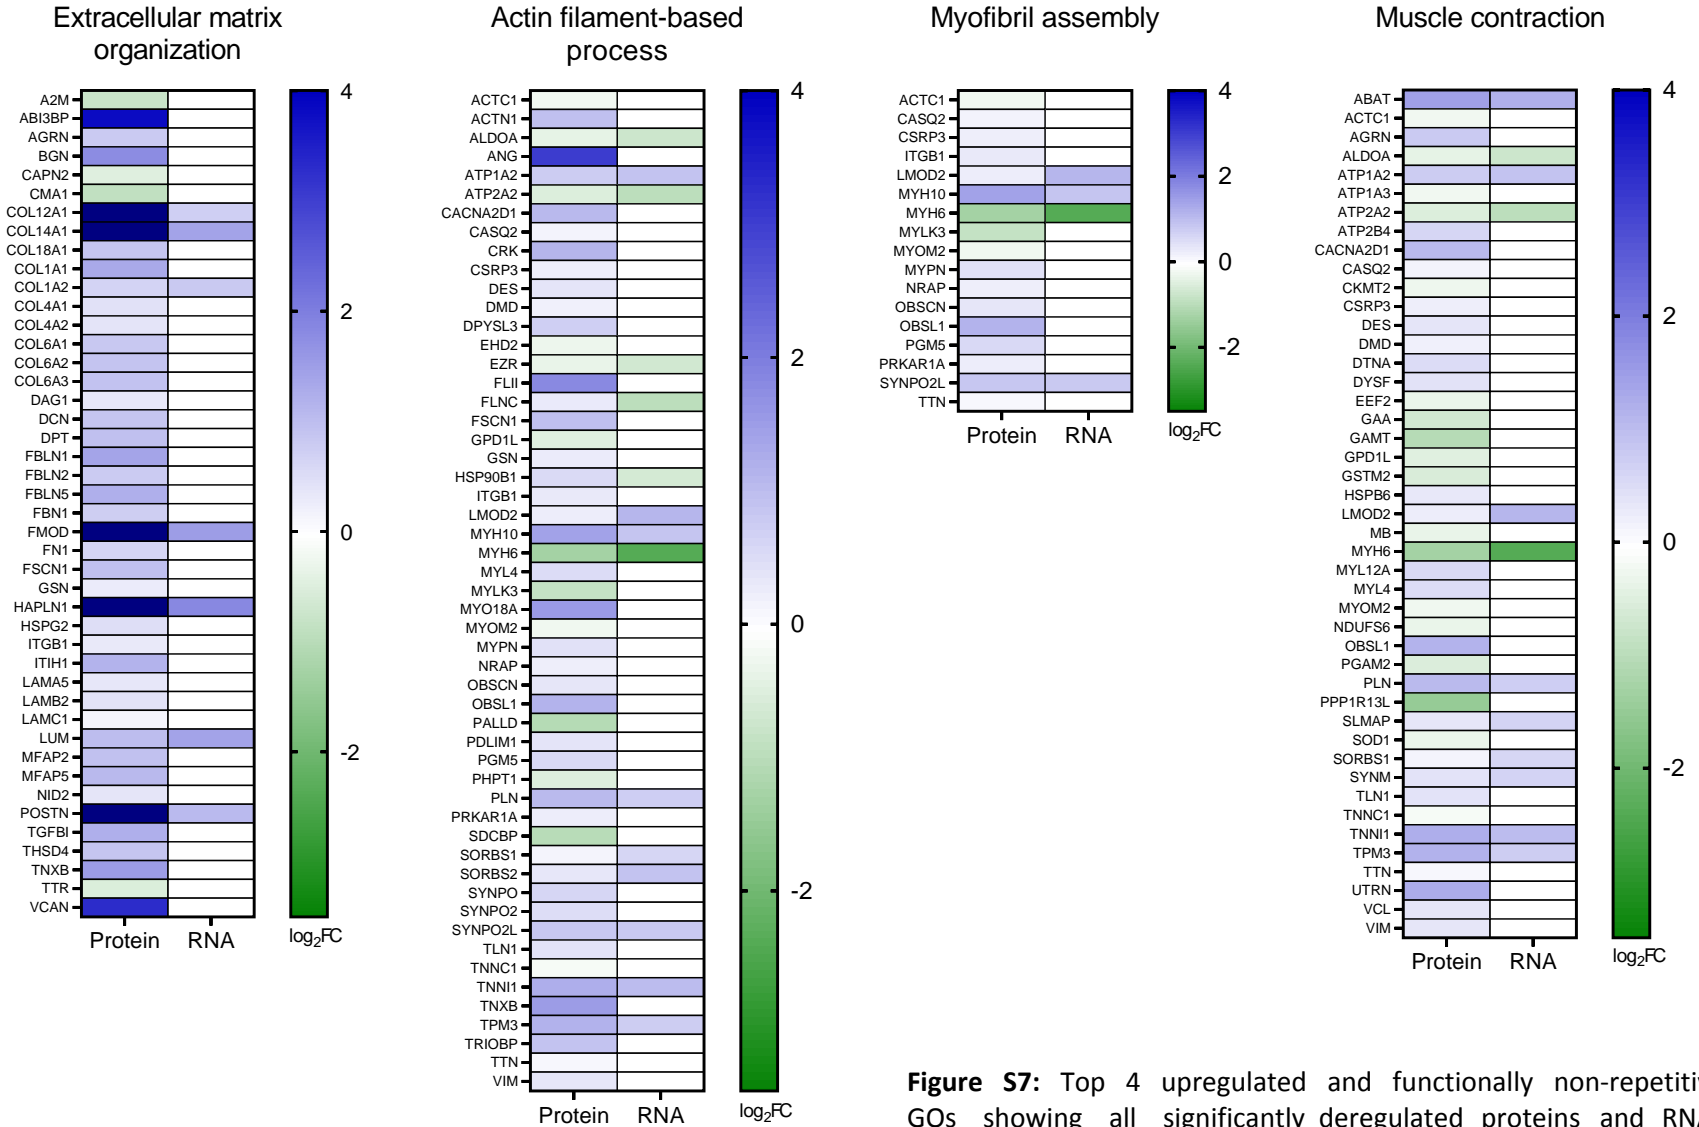

**Figure S7:** Top 4 upregulated and functionally non-repetitive GOs showing all significantly deregulated proteins and RNAs comparing HCM<sub>all</sub> with NF<sub>IVS</sub> annotated to the corresponding GO term. The color gradient indicates the log<sub>2</sub> fold change, dark blue beyond the color scale indicates a log<sub>2</sub> fold change >4.

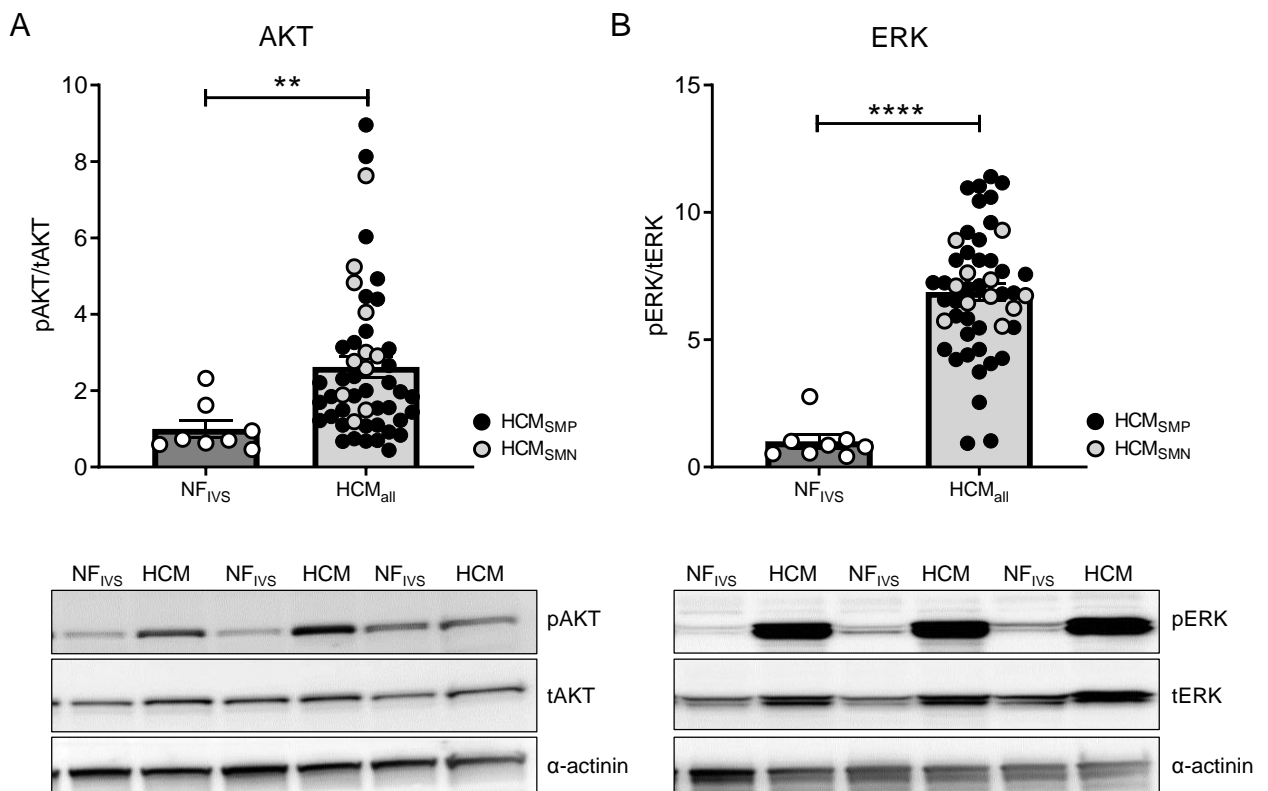

**Figure S8:** Cardiac hypertrophy markers. Expression (tAKT/tERK) and phosphorylation (pAKT/pERK) of the cardiac hypertrophy markers AKT (A) and ERK (B) with representative western blot images. Alpha-actinin was used as a loading control. Control group was set to 1. n(NF<sub>IVS</sub>)=8, n(HCM<sub>all</sub>)=49; two-tailed Mann-Whitney test, \*\*\*\* p<0.0001, \*\* p=0.0018.



Downregulated proteins  
common for all genotypes

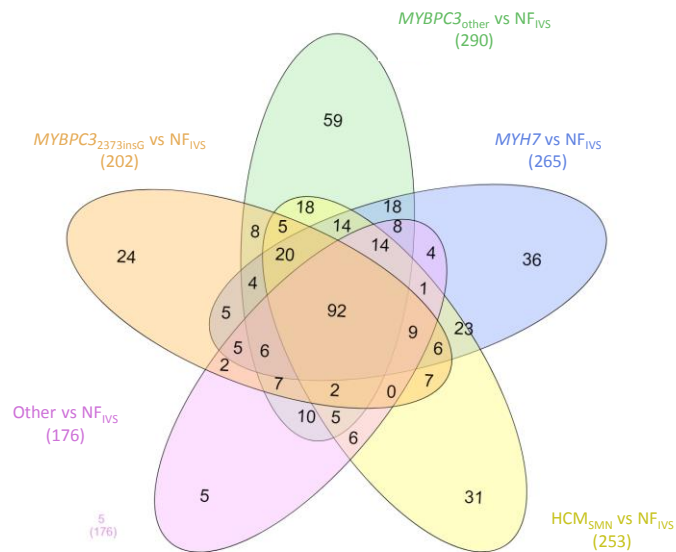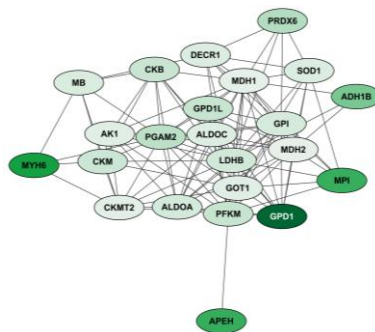

1. NAD metabolic process  
(GO: 19674)  
23 nodes ( $p=1.6863E-18$ )

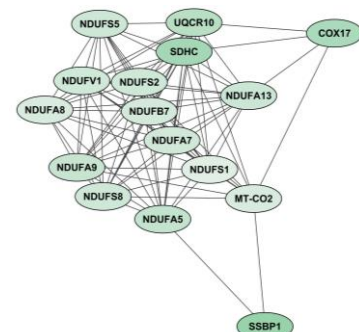

2. Mitochondrial ATP synthesis coupled  
electron transport  
(GO: 42775)  
16 nodes ( $p=2.7090E-31$ )

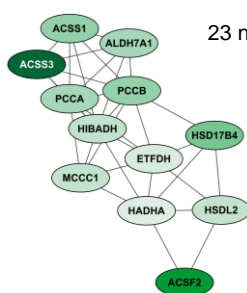

3. Organic acid catabolic process  
(GO: 16054)  
12 nodes ( $p=8.8917E-13$ )

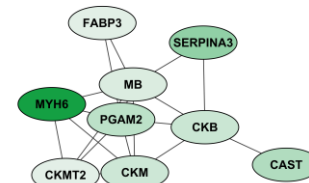

4. Phosphocreatine biosynthetic  
process  
(GO: 46314)  
9 nodes ( $p=3.5124E-10$ )

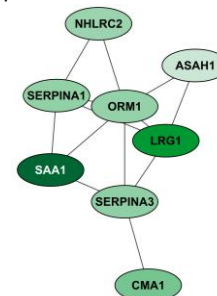

5. Acute-phase response  
(GO: 6953)  
8 nodes ( $p=1.4848E-9$ )

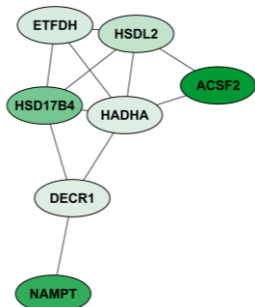

6. Fatty acid beta-oxidation  
(GO: 6635)  
7 nodes ( $p=3.2066E-9$ )

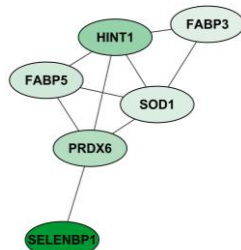

7. Glycerolipid catabolic process  
(GO: 46503)  
6 nodes ( $p=4.8674E-7$ )

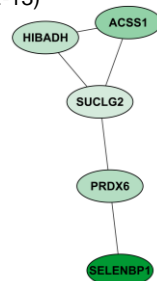

8. Oxidation-reduction process  
(GO: 55114)  
5 nodes ( $p=4.6450E-7$ )

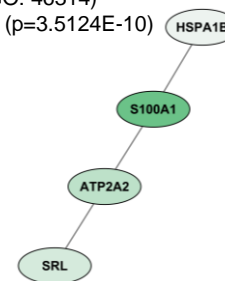

9. Cellular response to heat  
(GO: 34605)  
4 nodes ( $p=4.3800E-5$ )

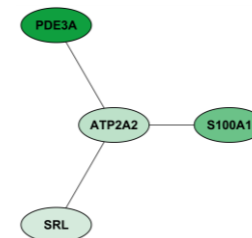

10. Calcium ion transport from cytosol to  
endoplasmic reticulum  
(GO: 1903515)  
4 nodes ( $p=1.6755E-4$ )

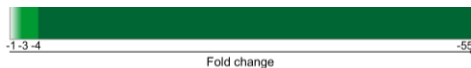

**Figure S9:** Venn diagram of significantly downregulated proteins of all 5 mutation groups compared to NF<sub>IVS</sub>. The protein interaction cluster were generated from the overlapping proteins and show downregulated processes, that are common between all groups compared to NF<sub>IVS</sub>. The color gradient from light to dark indicates an increase in fold change.



**Figure S10:** Venn diagram of significantly upregulated proteins of all 5 mutation groups compared to NF<sub>IVS</sub>. The protein interaction cluster were generated from the overlapping proteins and show upregulated processes, that are common between all groups compared to NF<sub>IVS</sub>. The color gradient from light to dark indicates an increase in fold change.

Figure S11

Downregulated proteins

HCM<sub>SMP</sub> vs NF<sub>IVS</sub>

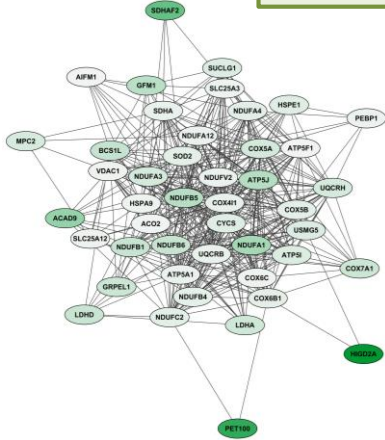

1. Oxidative phosphorylation  
(GO: 6119)  
45 nodes (p=3.7488E-42)

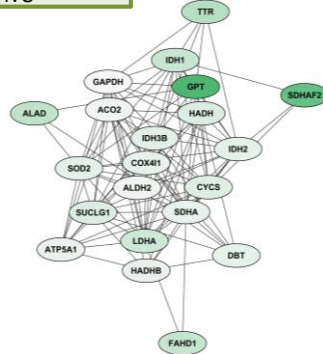

2. Aerobic respiration  
(GO: 9060)  
21 nodes (p=5.2550E-19)

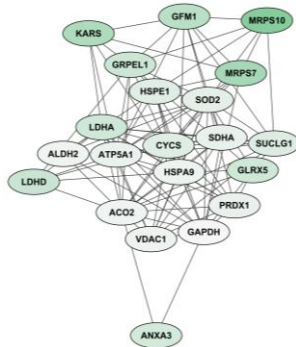

3. Generation of precursor metabolites and energy  
(GO: 6091)  
21 nodes (p=4.1559E-10)

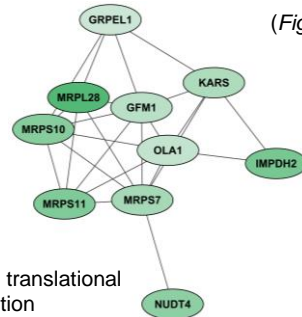

5. Mitochondrial translational elongation  
(GO: 70125)  
10 nodes (p=5.9619E-10)

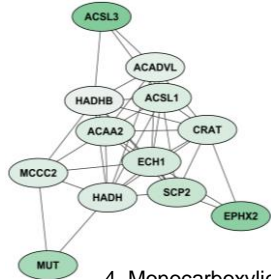

4. Monocarboxylic acid metabolic process  
(GO: 32787)  
12 nodes (p=3.4967E-19)

HCM<sub>SMN</sub> vs NF<sub>IVS</sub>

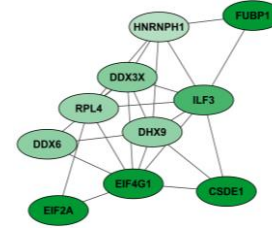

1. Stress granule assembly  
(GO: 34063)  
10 nodes (p=6.9998E-8)

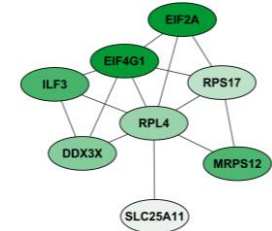

2. Translational initiation  
(GO: 6413)  
8 nodes (p=1.6065E-9)

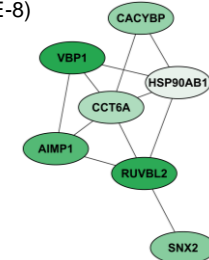

3. Protein folding  
(GO: 6457)  
7 nodes (p=8.2504E-7)

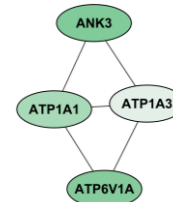

4. Response to glycoside  
(GO: 1903416)  
4 nodes (p=2.2457E-7)

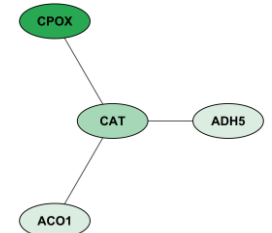

5. Antibiotic metabolic process  
(GO: 16999)  
4 nodes (p=7.3658E-7)

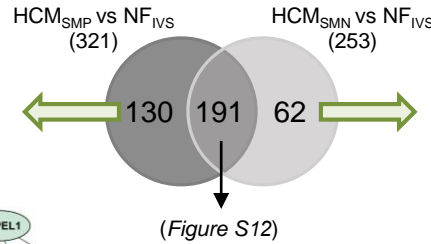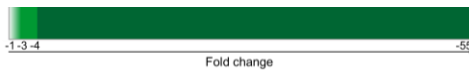

**Figure S11:** Differences in downregulated proteins between HCM<sub>SMP</sub> and HCM<sub>SMN</sub>. Protein interaction cluster of proteins that are only significantly downregulated for the HCM<sub>SMP</sub> vs NF<sub>IVS</sub> or the HCM<sub>SMN</sub> vs NF<sub>IVS</sub> comparison were identified and are displayed with the most significant corresponding gene ontology (GO) term. The top 5 protein interaction clusters of downregulated proteins are displayed. The color gradient from light to dark indicates an increase in fold change.

Downregulated proteins  
common for HCM<sub>SMP</sub> and HCM<sub>SMN</sub> when compared to NF<sub>IVS</sub>

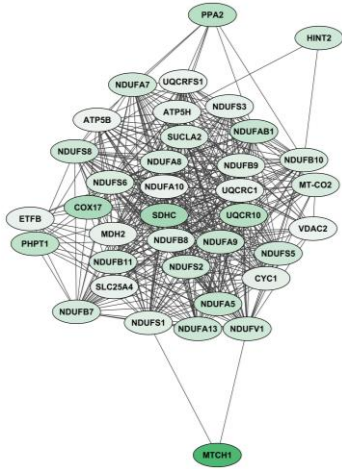

1. Oxidative phosphorylation  
(GO: 6119)  
37 nodes (p=1.0285E-52)

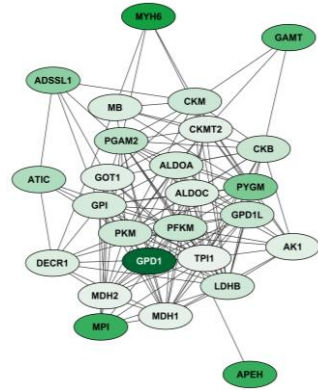

2. NAD metabolic process  
(GO: 19674)  
26 nodes (p=6.6256E-23)

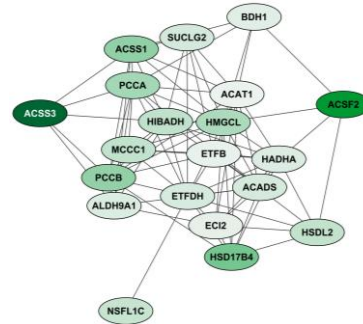

3. Carboxylic acid catabolic process  
(GO: 46395)  
20 nodes (p=8.5103E-18)

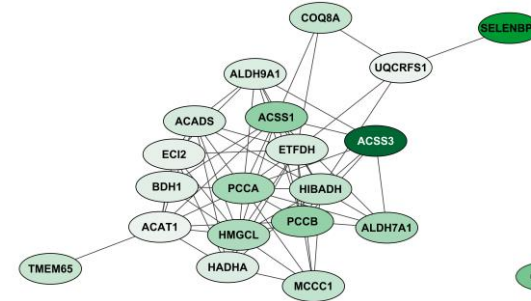

4. Carboxylic acid catabolic process  
(GO: 46395)  
19 nodes (p=3.6412E-16)

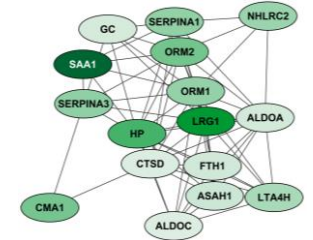

5. Regulated exocytosis  
(GO: 45055)  
16 nodes (p=1.9023E-16)

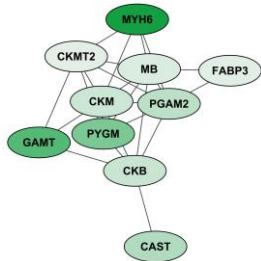

6. Creatine metabolic process  
(GO: 6600)  
10 nodes (p=1.7159E-12)

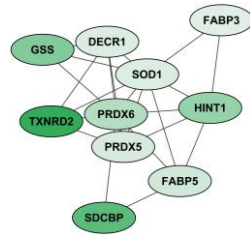

7. Cellular oxidant detoxification  
(GO: 98869)  
10 nodes (p=1.2808E-7)

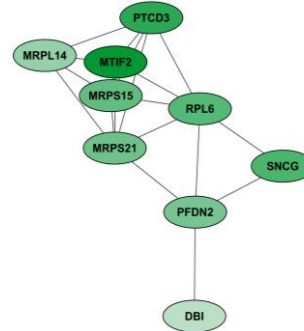

8. Mitochondrial translation  
(GO: 32543)  
9 nodes (p=1.0811E-9)

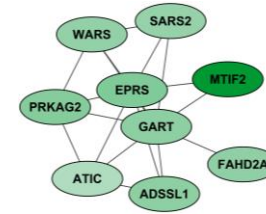

9. Organonitrogen compound  
biosynthetic process  
(GO: 1901566)  
9 nodes (p=1.3873E-9)

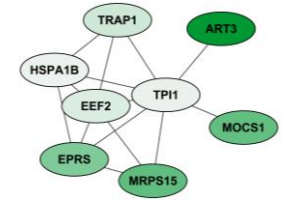

10. Chaperone-mediated  
protein folding  
(GO: 61077)  
8 nodes (p=2.8520E-4)

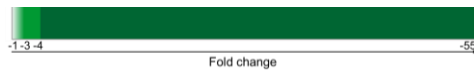

**Figure S12:** Protein interaction cluster of all significantly downregulated proteins that are common between HCM<sub>SMP</sub> compared to NF<sub>IVS</sub> and HCM<sub>SMN</sub> compared to NF<sub>IVS</sub>. The color gradient from light to dark indicates an increase in fold change.



Upregulated proteins  
common for HCM<sub>SMP</sub> and HCM<sub>SMN</sub> when compared to NF<sub>IVS</sub>

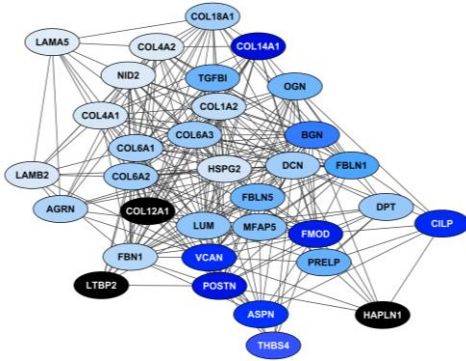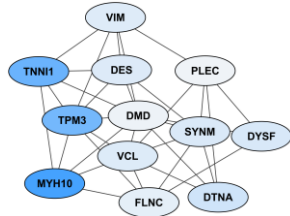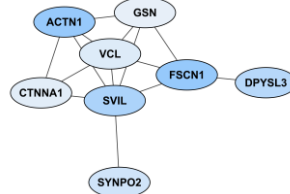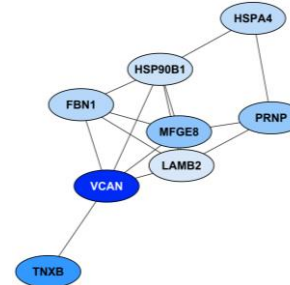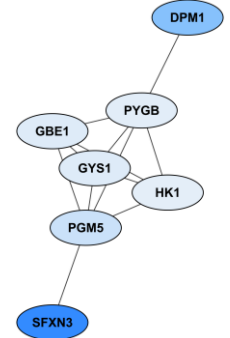

1. Extracellular matrix organization  
(GO: 30198)  
33 nodes (p=6.5379E-42)

2. Muscle contraction  
(GO: 6936)  
12 nodes (p=3.4440E-15)

3. Cell junction assembly  
(GO: 34329)  
8 nodes (p=4.8457E-7)

4. Post-translational protein modification  
(GO: 43687)  
8 nodes (p=1.6341E-7)

5. Carbohydrate metabolic process  
(GO: 5975)  
7 nodes (p=2.5060E-7)

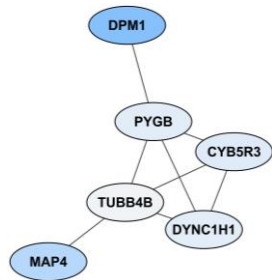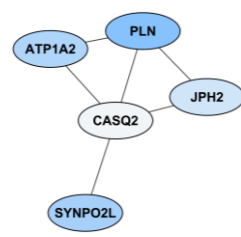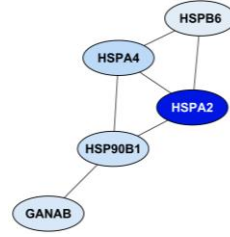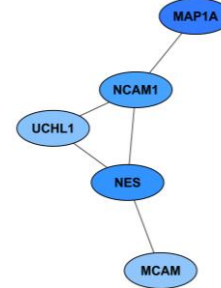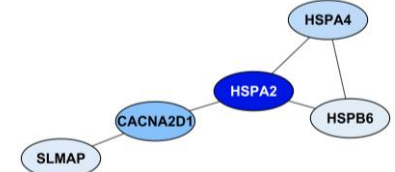

6. Neutrophil degranulation  
(GO: 43312)  
6 nodes (p=7.3315E-6)

10. Regulation of release of sequestered  
calcium ion into cytosol  
(GO: 51279)  
5 nodes (p=1.7490E-9)

8. Protein folding  
(GO: 6457)  
5 nodes (p=1.2023E-7)

7. Cell projection morphogenesis  
(GO: 48858)  
5 nodes (p=2.5598E-6)

11. Regulation of ion transmembrane  
transporter activity  
(GO: 32412)  
5 nodes (p=2.7626E-5)

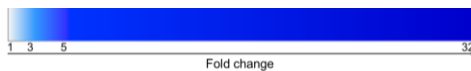

**Figure S13:** Protein interaction cluster of all significantly upregulated proteins that are common between HCM<sub>SMP</sub> compared to NF<sub>IVS</sub> and HCM<sub>SMN</sub> compared to NF<sub>IVS</sub>. The color gradient from light to dark indicates an increase in fold change.

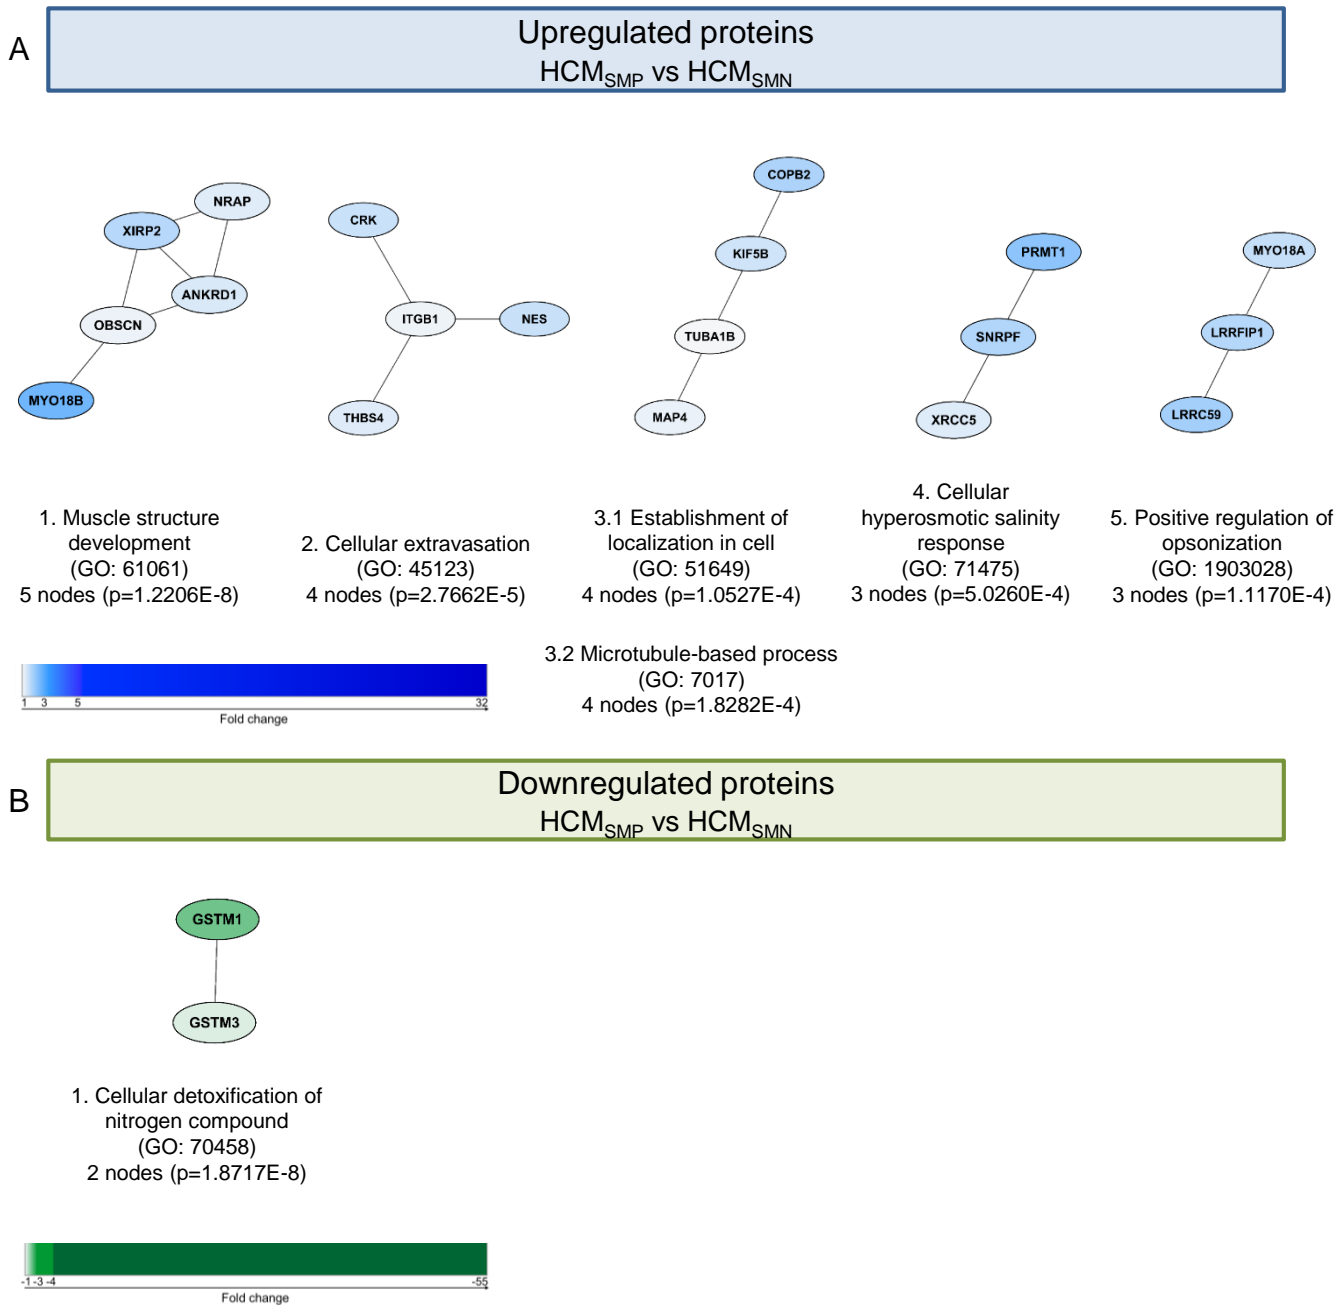

**Figure S14:** Protein interaction cluster of all significantly upregulated (A) and downregulated (B) proteins resulting from the direct comparison of HCM<sub>SMP</sub> and HCM<sub>SMN</sub>. The color gradient from light to dark indicates an increase in fold change.

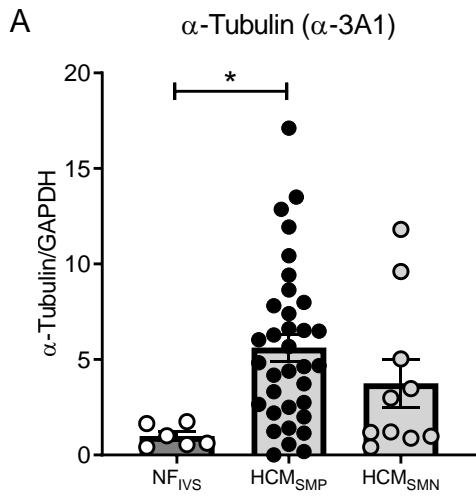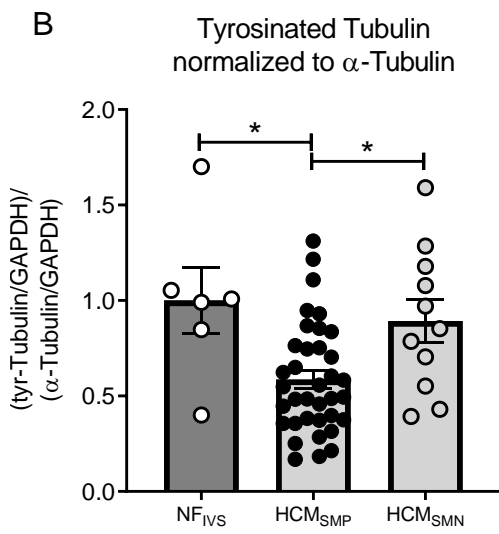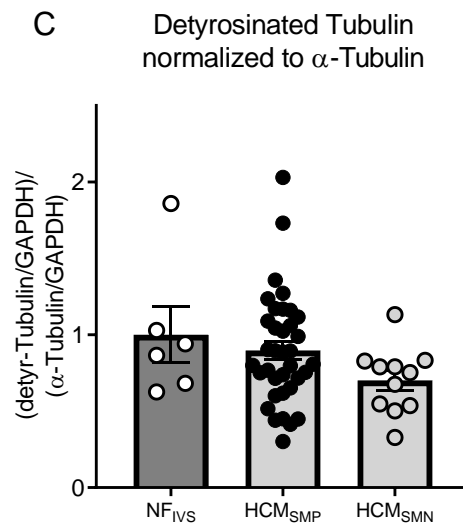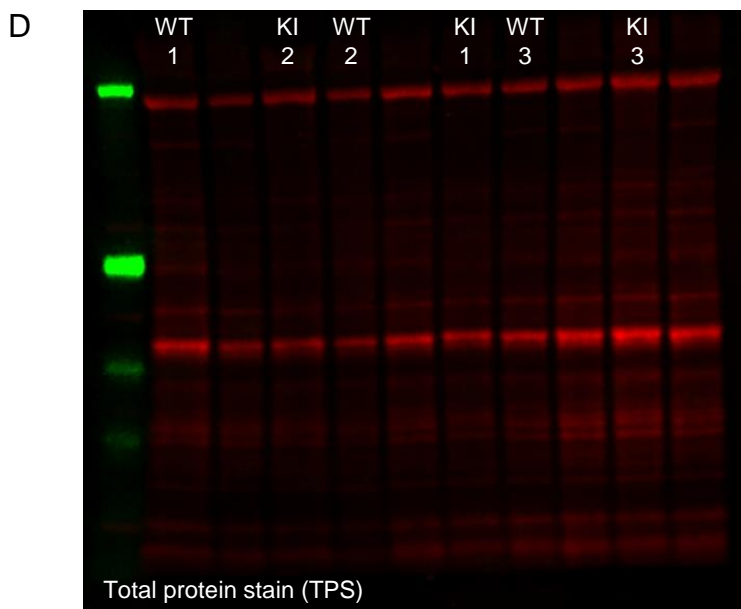

**Figure S15:** (A)  $\alpha$ -Tubulin ( $\alpha$ -3A1) western blot data. Protein levels of  $\alpha$ -tubulin with the  $\alpha$ -3A1 antibody normalized to GAPDH in tissue of HCM patients. One-way ANOVA with Tukey's multiple comparisons test, \*  $p=0.0257$ . Average of the control group is set to 1.  $n(\text{NF}_{\text{IVS}}/\text{HCM}_{\text{SMP}}/\text{HCM}_{\text{SMN}})=6/34/10$ . (B) and (C) show the protein levels of tyrosinated and detyrosinated tubulin normalized to total  $\alpha$ -Tubulin levels. One-way ANOVA with Tukey's multiple comparisons test, \*  $p<0.05$ . Average of the control group is set to 1.  $n(\text{NF}_{\text{IVS}}/\text{HCM}_{\text{SMP}}/\text{HCM}_{\text{SMN}})=6/36/11$ . (D) Total protein stain of western blot in Figure 6A that was used as loading control. The lanes labelled with WT 1-3 represent the lanes corresponding to the  $\alpha$ -Tubulin bands of the WT mice displayed from left to right, accordingly, KI 1-3 represent the lanes corresponding to the  $\alpha$ -Tubulin bands of the *MYBPC3*<sub>2373insG</sub> mice from left to right.

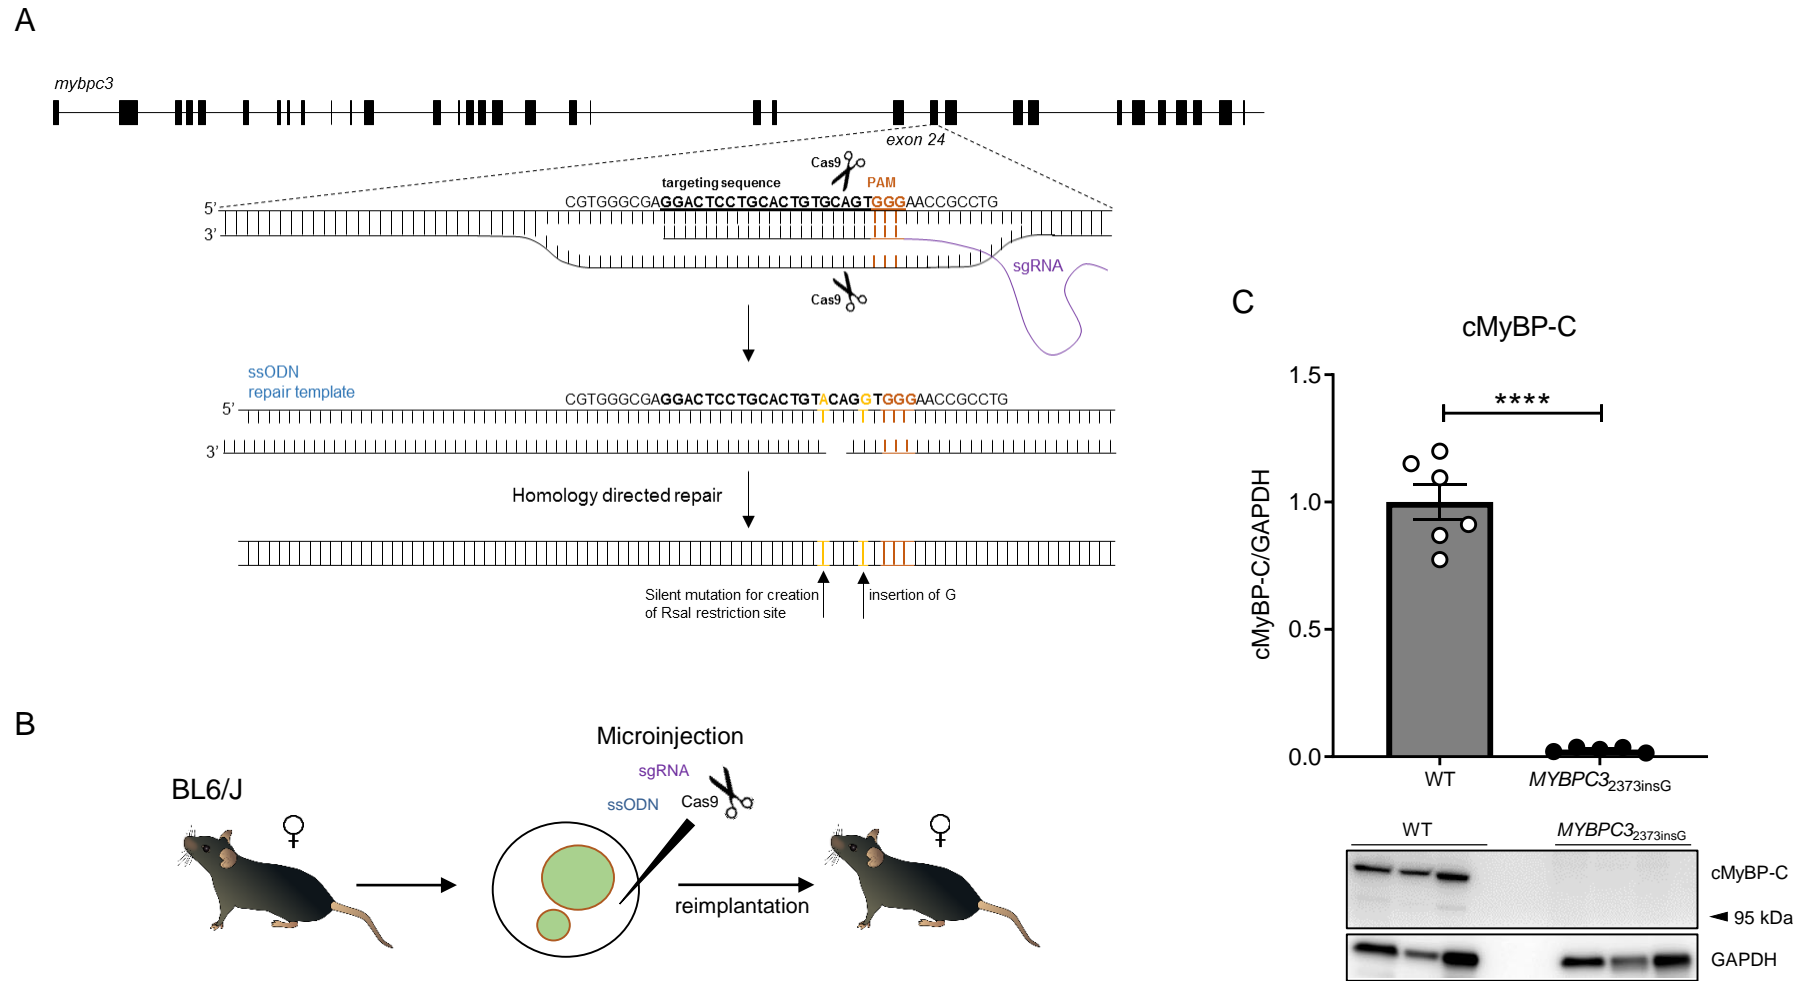

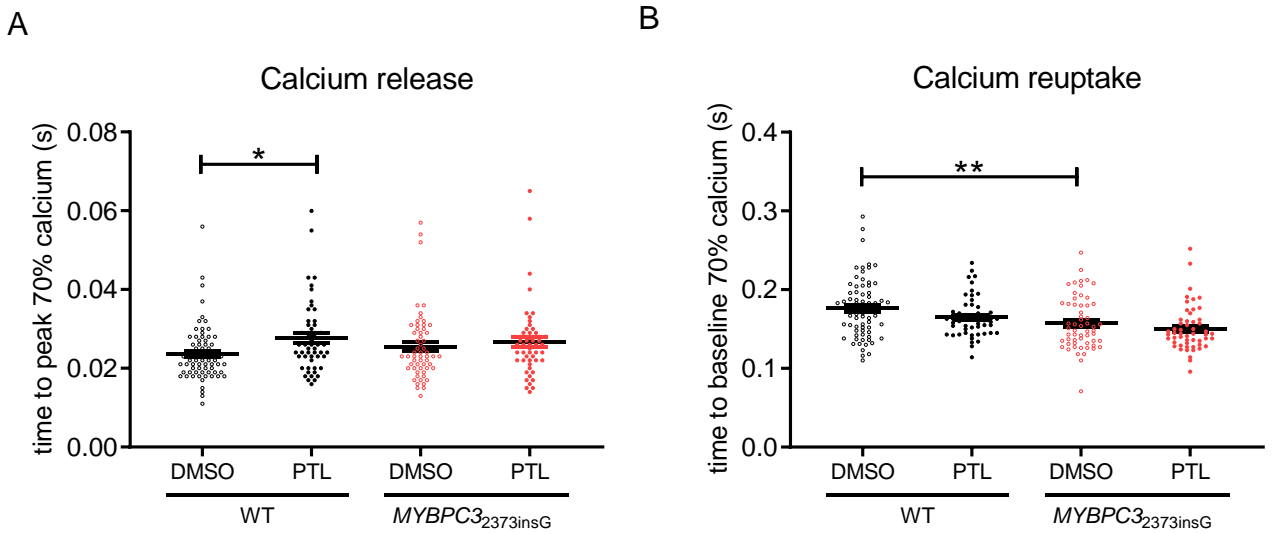

**Figure S17:** (A) and (B) Calcium kinetics of isolated *MYBPC3*<sub>2373insG</sub> cardiomyocytes upon inhibition of tubulin detyrosination. (A) displays the effect of PTL on the calcium release parameter time to peak 70% and (B) on the calcium reuptake parameter time to baseline 70%. The dotted line visualizes the WT baseline level. For (A-B) N(WT mice)=2 (2 males, 13-19 weeks) with total n(cells DMSO/PTL)=74/53 and N(*MYBPC3*<sub>2373insG</sub> mice)=3 (3 males, 13-19 weeks) with total n(cells DMSO/PTL)=58/53. (A) and (B) were analyzed by 2way-ANOVA, \*\* p=0.0479, \*\* p=0.0045.
